# Supplementary material for: LINC00106/RPS19BP1/p53 axis promotes the proliferation and migration of human prostate cancer cells
Source: PeerJ journal article supplement (doi:10.7717/peerj.15232), 2023-05-08
Supplement: Luciferase_Assay.zip [file Luciferase_Assay.zip]

## Sheet: luc
软件版本	2.04.11
实验文件路径:	F:\
方案文件路径:
板编号	板 1
日期	2022-03-03
时间	07:23:34
检测仪类型:	Synergy 2
检测仪序列号:	271352
检测类型	检测仪
程序详细信息
板类型	96 WELL PLATE
检测	吸收光 终点
	全板
	波长: full
	检测速度: 正常, 延迟: 100 msec, 测量值/数据点: 8
结果
		1	2	3	4	5	6	7	8	9	10	11	12
	A	435	412	473										EV
	B	210	197	189										pcDNA3.1-RPS19BP1
	C	372	401	389										pcDNA3.1-RPS19BP1+si-LINC
	D
	E
	F
	G
	H

## Sheet: re
软件版本	2.04.11
实验文件路径:	F:\
方案文件路径:
板编号	板 1
日期	2022-03-03
时间	10:12:05
检测仪类型:	Synergy 2
检测仪序列号:	271352
检测类型	检测仪
程序详细信息
板类型	96 WELL PLATE
检测	吸收光 终点
	全板
	波长: full
	检测速度: 正常, 延迟: 100 msec, 测量值/数据点: 8
结果
		1	2	3	4	5	6	7	8	9	10	11	12
	A	117	115	109
	B	123	123	113
	C	117	185	164
	D
	E
	F
	G
	H

## Sheet: 统计
			luc				re
		435	412	473		117	115	109		EV
		210	197	189		123	123	113		pcDNA3.1-RPS19BP1
		372	401	389		117	185	164		pcDNA3.1-RPS19BP1+si-LINC
				3.71795	3.58261	4.33945
				1.70732	1.60163	1.67257
				3.17949	2.16757	2.37195
				矫正
				0.958234	0.923353	1.11841
				0.44003	0.41279	0.431074
				0.819455	0.558651	0.611328
