# Supplementary material for: LINC00106/RPS19BP1/p53 axis promotes the proliferation and migration of human prostate cancer cells
Source: PeerJ. 2023 May 8;11:e15232. doi: 10.7717/peerj.15232 (PMC10174055; doi:10.7717/peerj.15232)
Supplement: Supplemental Information 2 — Proteins that may interact with LINC00106 were predicted based on catRAPID omics v2.1 prediction software [file peerj-11-15232-s002.xlsx]

## Sheet: Sheet1
Protein_ID	Interaction_Propensity	Z_score	RBP_Propensity	RNA_Binding_Domains_IDs	numof.RNA.Binding	Ranking
Q8IXM3_MRPL41	34.17	1.36	1	PF09809	1	0.556542
Q86WX3_RPS19BP1	33.82	1.34	1	-	0	0.555625
O15514_POLR2D	32.98	1.28	1	PF03874	1	0.553458
O43399_TPD52L2	32.5	1.25	1	-	0	0.552208
O75822_EIF3J	31.59	1.2	1	PF08597	1	0.549875
P62244_RPS15A	31.23	1.17	1	PF00410	1	0.548917
P37108_SRP14	31.04	1.16	1	PF02290	1	0.548417
Q13901_C1D	31.03	1.16	1	PF04000	1	0.548417
O75817_POP7	30.42	1.12	1	PF12328,PF01918	2	0.546833
P55145_MANF	30.21	1.11	1	-	0	0.546292
P52758_RIDA	29.71	1.08	1	PF01042	1	0.545
P82979_SARNP	29.48	1.06	1	PF02037	1	0.544375
Q86V81_ALYREF	29.2	1.05	1	PF00076	1	0.710333
P62249_RPS16	29.06	1.04	1	PF00380	1	0.543292
P83876_TXNL4A	28.97	1.03	1	-	0	0.543083
Q5D1E8_ZC3H12A	28.84	1.03	1	PF11977	1	0.54275
P20290_BTF3	28.74	1.02	1	-	0	0.542458
P55769_SNU13	28.58	1.01	1	PF01248,PF08228	2	0.542042
Q9Y221_NIP7	28.56	1.01	1	PF03657	1	0.542
Q9Y3D3_MRPS16	28.48	1	1	PF00886	1	0.541792
Q96CP2_FLYWCH2	28.42	1	1	-	0	0.541667
Q9Y3B7_MRPL11	28.24	0.99	1	PF03946,PF00298	2	0.541167
O43324_EEF1E1	28.15	0.98	1	-	0	0.540958
Q9Y3E5_PTRH2	28.15	0.98	1	PF01981	1	0.540958
Q8WW12_PCNP	28.05	0.98	1	-	0	0.540708
Q9NWU5_MRPL22	27.88	0.97	1	PF00237	1	0.54025
Q9Y6G3_MRPL42	27.8	0.96	1	PF10210	1	0.540042
Q9NPE2_NGRN	27.37	0.93	1	-	0	0.538917
P61326_MAGOH	27.28	0.93	1	PF02792	1	0.538708
Q86U42_PABPN1	27.17	0.92	1	PF00076	1	0.538417
Q9BUL9_RPP25	26.94	0.91	1	PF01918	1	0.537833
Q9H840_GEMIN7	26.92	0.91	1	PF11095,PF12901	2	0.53775
P61353_RPL27	26.85	0.9	1	PF01777,PF00467	2	0.537583
Q9Y5S9_RBM8A	26.69	0.89	1	PF00076,PF08777	2	0.537167
O43716_GATC	26.66	0.89	1	PF02686	1	0.537083
Q9Y3D5_MRPS18C	26.6	0.89	1	PF01084	1	0.536917
O00422_SAP18	26.49	0.88	1	PF06487	1	0.536667
P62910_RPL32	26.47	0.88	1	PF01655	1	0.536583
Q01081_U2AF1	26.44	0.88	1	PF00642,PF00076	3	0.5365
Q9BRJ7_NUDT16L1	26.36	0.87	1	-	0	0.536292
Q9BQ65_USB1	26.34	0.87	1	PF09749	1	0.53625
Q8WU43_C2orf15	26.29	0.87	1	-	0	0.536125
Q9Y237_PIN4	26.28	0.87	1	-	0	0.536083
P82970_HMGN5	26.08	0.85	1	-	0	0.535583
P61970_NUTF2	26.04	0.85	1	PF02136	1	0.5355
Q9CPV3_Mrpl42	25.99	0.85	1	PF10210	1	0.535333
Q9UKK6_NXT1	25.98	0.85	1	PF02136	1	0.535333
Q9UI30_TRMT112	25.87	0.84	1	PF03966	1	0.535042
P62899_RPL31	25.82	0.84	1	PF01198	1	0.534917
Q8N5K1_CISD2	25.76	0.83	1	-	0	0.53475
P84077_ARF1	25.74	0.83	1	PF08477,PF01926	2	0.534708
Q6PUV4_CPLX2	25.57	0.82	1	-	0	0.53425
P46779_RPL28	25.48	0.82	1	PF01778	1	0.534042
O15116_LSM1	25.43	0.81	1	PF01423	1	0.533917
O95059_RPP14	25.34	0.81	1	PF01900	1	0.533667
P62847_RPS24	25.33	0.81	1	PF01282	1	0.533625
Q99497_PARK7	25.3	0.81	1	-	0	0.533583
Q9BPZ3_PAIP2	25.24	0.8	1	PF07145	1	0.533417
P07737_PFN1	25.21	0.8	1	-	0	0.533333
P35268_RPL22	25.2	0.8	1	PF01776	1	0.533292
P62851_RPS25	25.16	0.8	1	PF03297	1	0.533208
P62269_RPS18	25.13	0.8	1	PF00416	1	0.533125
Q9BRP8_PYM1	25.12	0.79	1	PF09282	1	0.533083
P06748_NPM1	25.08	0.79	1	PF03066	1	0.533
Q9BSV6_TSEN34	25.01	0.79	1	PF01974	1	0.532792
P61313_RPL15	25	0.79	1	PF00827	1	0.532792
Q9ULP0_NDRG4	24.94	0.78	1	-	0	0.532625
Q9BYC9_MRPL20	24.89	0.78	1	PF00453	1	0.5325
Q9NX01_TXNL4B	24.84	0.78	1	-	0	0.532375
P61088_UBE2N	24.82	0.78	1	-	0	0.532333
P10599_TXN	24.75	0.77	1	-	0	0.532125
Q96DE0_NUDT16	24.73	0.77	1	-	0	0.532083
P62266_RPS23	24.71	0.77	1	PF00164	1	0.532042
Q8WU68_U2AF1L4	24.65	0.76	1	PF00642,PF00076	3	0.531875
Q7Z7F7_MRPL55	24.5	0.76	1	PF09776	1	0.5315
Q9UNP9_PPIE	24.5	0.76	1	PF00160,PF00076	2	0.5315
P52815_MRPL12	24.39	0.75	1	PF00542	1	0.531208
Q6P161_MRPL54	24.37	0.75	1	PF08561	1	0.531167
P25398_RPS12	24.28	0.74	1	PF01248	1	0.530917
Q16540_MRPL23	24.14	0.73	1	PF00276	1	0.530542
P23528_CFL1	24	0.72	1	-	0	0.530208
P82664_MRPS10	23.97	0.72	1	PF00338	1	0.530125
Q15022_SUZ12	23.94	0.72	1	-	0	0.530042
Q9NRN9_METTL5	23.94	0.72	1	PF05175,PF13847,PF01170,PF09445	4	0.530042
Q5JQF8_PABPC1L2A	23.84	0.72	1	PF00076	2	0.529792
O95931_CBX7	23.83	0.71	1	-	0	0.52975
Q96MH2_HEXIM2	23.8	0.71	1	PF15313	1	0.529667
P06454_PTMA	23.71	0.71	1	-	0	0.529458
P82912_MRPS11	23.68	0.7	1	PF00411	1	0.529375
Q13405_MRPL49	23.68	0.7	1	PF05046	1	0.529375
Q9Y2V2_CARHSP1	23.68	0.7	1	PF00313	1	0.529375
P52435_POLR2J	23.62	0.7	1	PF13656,PF01193	2	0.529208
P30040_ERP29	23.57	0.7	1	-	0	0.529083
Q96A72_MAGOHB	23.57	0.7	1	PF02792	1	0.529083
Q6NW29_RWDD4	23.5	0.69	1	-	0	0.528917
Q9NPJ8_NXT2	23.44	0.69	1	PF02136	1	0.52875
Q86Y79_PTRH1	23.41	0.69	1	PF01195	1	0.528667
Q9BRJ6_C7orf50	23.41	0.69	1	-	0	0.528667
P08708_RPS17	23.36	0.68	1	PF00833	1	0.528542
Q6NTF7_APOBEC3H	23.35	0.68	1	PF08210,PF05240	2	0.5285
Q17RN3_FAM98C	23.34	0.68	1	PF10239	1	0.5285
P46776_RPL27A	23.32	0.68	1	PF00828	1	0.528417
Q9Y399_MRPS2	23.27	0.68	1	PF00318	2	0.528292
Q9Y3B2_EXOSC1	23.26	0.68	1	PF10447,PF14382	2	0.528292
P29692_EEF1D	23.15	0.67	1	PF00736	1	0.528
P40429_RPL13A	23.14	0.67	1	PF00572	1	0.527958
O43583_DENR	23.13	0.67	1	PF01253	1	0.527958
Q13243_SRSF5	23.08	0.67	1	PF00076	2	0.694458
Q9BV90_SNRNP25	23.05	0.67	1	-	0	0.52775
P43307_SSR1	23.03	0.66	1	-	0	0.527667
P62701_RPS4X	23	0.66	1	PF00900,PF08071,PF01479,PF00467	4	0.527625
Q9Y3C1_NOP16	22.96	0.66	1	PF09420	2	0.5275
Q96H35_RBM18	22.94	0.66	1	PF00076	1	0.527458
P32969_RPL9	22.9	0.66	1	PF00347	2	0.527333
P82663_MRPS25	22.73	0.65	1	PF05047	1	0.526917
P52434_POLR2H	22.69	0.64	1	PF03870	1	0.526792
Q6GMV3_PTRHD1	22.67	0.64	1	PF01981	1	0.52675
Q9Y2R5_MRPS17	22.66	0.64	1	PF00366	1	0.526708
Q9NVS2_MRPS18A	22.63	0.64	1	PF01084	1	0.526625
Q8TD47_RPS4Y2	22.62	0.64	1	PF00900,PF08071,PF00467	3	0.526625
Q9UNX3_RPL26L1	22.61	0.64	1	PF00467	1	0.526583
P15531_NME1	22.5	0.63	1	-	0	0.526292
P22090_RPS4Y1	22.46	0.63	1	PF00900,PF08071,PF00467	3	0.526208
P26885_FKBP2	22.43	0.63	1	PF00254	1	0.526125
P61254_RPL26	22.3	0.62	1	PF00467	1	0.525792
P31483_TIA1	22.26	0.62	1	PF00076	3	0.525667
P78346_RPP30	22.26	0.62	1	PF01876	1	0.525667
Q9NV31_IMP3	22.24	0.62	1	PF01479,PF00163	2	0.525625
Q6IEG0_SNRNP48	22.23	0.62	1	PF05253	1	0.525625
P09132_SRP19	22.22	0.61	1	PF01922	1	0.69225
P21127_CDK11B	22.22	0.61	1	-	0	0.525583
Q9GZV4_EIF5A2	22.11	0.61	1	PF01287	1	0.525292
Q02252_ALDH6A1	22.08	0.6	1	-	0	0.525208
P14625_HSP90B1	22.06	0.6	1	-	0	0.525167
P39019_RPS19	22.04	0.6	1	PF01090	1	0.525125
A6NDY0_PABPN1L	22	0.6	1	-	0	0.525
O75394_MRPL33	21.87	0.59	1	PF00471	1	0.524667
Q9H2K0_MTIF3	21.87	0.59	1	-	0	0.524667
Q96A35_MRPL24	21.84	0.59	1	PF00467	1	0.524583
Q9BWF3_RBM4	21.82	0.59	1	PF00076,PF13893,PF00098	4	0.524542
Q9BYN8_MRPS26	21.82	0.59	1	PF14943	1	0.524542
P62263_RPS14	21.75	0.58	1	PF00411	1	0.524375
Q9BWU0_SLC4A1AP	21.71	0.58	1	PF00498	1	0.52425
Q5GAN4_RNASE12	21.65	0.58	1	PF00074	1	0.524125
Q96IZ6_METTL2A	21.64	0.58	1	PF13847	1	0.524083
Q6P1Q9_METTL2B	21.63	0.58	1	PF13847	1	0.524042
P68036_UBE2L3	21.53	0.57	1	-	0	0.523792
Q8WW01_TSEN15	21.47	0.57	1	PF09631	1	0.523625
P16403_H1-2	21.46	0.57	1	-	0	0.523625
Q5T035_C9orf129	21.41	0.56	1	-	0	0.5235
O60783_MRPS14	21.35	0.56	1	PF00253	1	0.523333
Q9HA38_ZMAT3	21.3	0.56	1	PF12171,PF12874	5	0.523208
Q9P2T1_GMPR2	21.28	0.56	1	-	0	0.523167
Q96EL2_MRPS24	21.26	0.55	1	PF14955	1	0.523083
Q6IS14_EIF5AL1	21.21	0.55	1	PF01287	1	0.522958
O95400_CD2BP2	21.2	0.55	1	-	0	0.522958
Q9P0M9_MRPL27	21.16	0.55	1	PF01016	1	0.522833
P63241_EIF5A	21.14	0.55	1	PF01287	1	0.522792
Q14493_SLBP	21.09	0.54	1	PF15247	1	0.522667
Q7Z5W3_BCDIN3D	21.08	0.54	1	PF06859	1	0.522625
P42766_RPL35	21.06	0.54	1	PF00831	1	0.522583
Q96MW1_CCDC43	21.02	0.54	1	-	0	0.522458
Q4U2R6_MRPL51	21	0.54	1	PF10244	1	0.522417
P54253_ATXN1	20.98	0.54	1	PF08517	1	0.522375
A6NMK7_CPSF4L	20.87	0.53	1	PF00642	1	0.522083
P62913_RPL11	20.84	0.53	1	PF00281,PF00673	2	0.522
P63279_UBE2I	20.82	0.53	1	-	0	0.521958
Q9NVM6_DNAJC17	20.82	0.53	1	PF00076	1	0.521958
Q02543_RPL18A	20.73	0.52	1	PF01775	1	0.521708
Q9UK45_LSM7	20.72	0.52	1	PF01423	1	0.521708
Q12904_AIMP1	20.62	0.51	1	PF01588	1	0.521417
P09382_LGALS1	20.59	0.51	1	-	0	0.521375
Q92522_H1-10	20.52	0.51	1	-	0	0.521167
Q99547_MPHOSPH6	20.5	0.51	1	PF10175	1	0.521125
Q5JTJ3_COA6	20.49	0.51	1	-	0	0.521083
Q9H1A7_POLR2J3	20.47	0.5	1	PF13656,PF01193	2	0.521042
Q9ULR5_PAIP2B	20.47	0.5	1	PF07145	1	0.521042
Q04837_SSBP1	20.44	0.5	1	-	0	0.520958
Q15061_WDR43	20.43	0.5	1	PF04003,PF00400	2	0.520958
P25789_PSMA4	20.36	0.5	1	-	0	0.52075
Q969E8_TSR2	20.33	0.5	1	PF10273	1	0.520667
P13693_TPT1	20.3	0.5	1	-	0	0.520625
Q969L4_LSM10	20.29	0.49	1	PF01423	1	0.520583
Q9H9L3_ISG20L2	20.27	0.49	1	PF00929	1	0.520542
Q9UPT8_ZC3H4	20.25	0.49	1	PF00642	1	0.520458
Q8N2A8_PLD6	20.24	0.49	1	-	0	0.520458
Q6I9Y2_THOC7	20.23	0.49	1	PF05615	1	0.520417
Q8N567_ZCCHC9	20.23	0.49	1	PF00098	1	0.520417
Q9BYG3_NIFK	20.16	0.49	1	PF00076	1	0.52025
Q9NX07_TRNAU1AP	20.16	0.49	1	PF00076	2	0.52025
O43290_SART1	20.13	0.48	1	PF03343	1	0.520167
P62829_RPL23	20.12	0.48	1	PF00238	1	0.520125
Q9Y2Q9_MRPS28	20.12	0.48	1	PF10246	1	0.520125
Q06830_PRDX1	20.05	0.48	1	-	0	0.519958
P12956_XRCC6	20.01	0.48	1	PF03731,PF02735,PF03730,PF02037	4	0.519875
Q9NPJ4_PNRC2	19.96	0.47	1	-	0	0.519708
P62314_SNRPD1	19.95	0.47	1	PF01423	1	0.519708
Q5GAN6_RNASE10	19.95	0.47	1	PF00074	1	0.519708
Q9GZM3_POLR2J2	19.93	0.47	1	PF13656,PF01193	2	0.519667
P62987_UBA52	19.92	0.47	1	PF01020	1	0.519625
O95639_CPSF4	19.91	0.47	1	PF00642,PF00098	3	0.519583
P60866_RPS20	19.91	0.47	1	PF00338	1	0.519583
Q96EY4_TMA16	19.91	0.47	1	-	0	0.519583
Q9BRA0_NAA38	19.91	0.47	1	PF01423	1	0.519583
O60869_EDF1	19.9	0.47	1	-	0	0.519583
Q9Y2W6_TDRKH	19.88	0.47	1	PF00013,PF00567	3	0.5195
Q9H2U1_DHX36	19.87	0.47	1	PF04408,PF00271,PF00270	3	0.5195
Q9BQ75_CMSS1	19.85	0.47	1	PF14617,PF00270	2	0.519458
Q9BRT6_LLPH	19.85	0.47	1	-	0	0.519458
P46782_RPS5	19.84	0.47	1	PF00177	1	0.519417
O75607_NPM3	19.83	0.46	1	PF03066	1	0.519375
P21291_CSRP1	19.82	0.46	1	-	0	0.519375
Q8N5A5_ZGPAT	19.81	0.46	1	PF01585	1	0.519333
Q9Y6A4_CFAP20	19.79	0.46	1	-	0	0.519292
Q8N1W1_ARHGEF28	19.75	0.46	1	-	0	0.519167
Q13595_TRA2A	19.74	0.46	1	PF00076	1	0.685833
Q96Q15_SMG1	19.74	0.46	1	-	0	0.519167
Q9NRA8_EIF4ENIF1	19.73	0.46	1	PF10477	1	0.519125
Q03701_CEBPZ	19.71	0.46	1	PF03914	1	0.519083
Q8IZQ5_SELENOH	19.71	0.46	1	-	0	0.519083
P63173_RPL38	19.7	0.46	1	PF01781	1	0.519042
Q7Z7H8_MRPL10	19.67	0.46	1	PF00466	1	0.518958
P06702_S100A9	19.59	0.45	1	-	0	0.51875
P30050_RPL12	19.55	0.45	1	PF03946,PF00298	2	0.518667
Q8TCC3_MRPL30	19.54	0.45	1	PF00327	1	0.518625
Q9GZZ1_NAA50	19.54	0.45	1	-	0	0.518625
A6PVI3_NCBP2L	19.48	0.44	1	PF00076	1	0.5185
P36776_LONP1	19.45	0.44	1	-	0	0.518417
O15347_HMGB3	19.34	0.44	1	-	0	0.518125
Q9NUP9_LIN7C	19.31	0.43	1	-	0	0.518042
Q86SE8_NPM2	19.3	0.43	1	PF03066	1	0.518
P20774_OGN	19.29	0.43	1	-	0	0.518
Q9NPE3_NOP10	19.28	0.43	1	PF04135	1	0.517958
Q9NQ50_MRPL40	19.26	0.43	1	PF09812	1	0.517917
P55263_ADK	19.25	0.43	1	-	0	0.517875
Q9UDW3_ZMAT5	19.25	0.43	1	PF00642,PF06220	2	0.517875
P25311_AZGP1	19.22	0.43	1	-	0	0.517792
V9GYY5_V9GYY5	19.2	0.43	1	PF09805	1	0.51775
Q5T7N2_L1TD1	19.19	0.43	1	PF02994	1	0.51775
Q9H825_METTL8	19.19	0.43	1	-	0	0.51775
P61218_POLR2F	19.16	0.42	1	PF01192	1	0.517667
Q6P5S7_RNASEK	19.15	0.42	1	-	0	0.517625
Q9Y3D9_MRPS23	19.14	0.42	1	PF10484	1	0.517583
P30405_PPIF	19.1	0.42	1	PF00160	1	0.5175
O60930_RNASEH1	19.08	0.42	1	PF00075	1	0.517458
Q8WXD5_GEMIN6	19.01	0.41	1	PF06372	1	0.51725
Q8WV60_PTCD2	18.97	0.41	1	PF10037	1	0.517167
P62979_RPS27A	18.96	0.41	1	PF01599	1	0.517125
Q15696_ZRSR2	18.93	0.41	1	PF00642,PF00076	3	0.517042
Q8N983_MRPL43	18.91	0.41	1	PF05047	1	0.517
Q9BYC8_MRPL32	18.91	0.41	1	PF01783	1	0.517
O60271_SPAG9	18.9	0.41	1	-	0	0.517
P36542_ATP5F1C	18.9	0.41	1	-	0	0.517
Q96J01_THOC3	18.89	0.41	1	PF00400,PF08662	3	0.516958
O60739_EIF1B	18.88	0.41	1	PF01253	1	0.516917
O75223_GGCT	18.88	0.41	1	-	0	0.516917
P41567_EIF1	18.88	0.41	1	PF01253	1	0.516917
Q01995_TAGLN	18.84	0.4	1	-	0	0.516833
P81605_DCD	18.82	0.4	1	-	0	0.516792
Q8TDP1_RNASEH2C	18.81	0.4	1	PF08615	1	0.51675
Q9Y608_LRRFIP2	18.8	0.4	1	PF09738	3	0.516708
P28799_GRN	18.78	0.4	1	-	0	0.516667
Q92614_MYO18A	18.73	0.4	1	-	0	0.516542
Q9Y3B9_RRP15	18.71	0.4	1	PF07890	1	0.5165
P34096_RNASE4	18.68	0.39	1	PF00074	1	0.516417
P62081_RPS7	18.67	0.39	1	PF01251	1	0.516375
Q6PK04_CCDC137	18.67	0.39	1	-	0	0.516375
Q93062_RBPMS	18.67	0.39	1	PF00076	1	0.516375
P53999_SUB1	18.65	0.39	1	PF02229	1	0.516333
P54277_PMS1	18.65	0.39	1	-	0	0.516333
Q9BQ04_RBM4B	18.65	0.39	1	PF00076,PF13893,PF00098	4	0.516333
P78345_RPP38	18.6	0.39	1	PF01248	1	0.516208
Q13151_HNRNPA0	18.6	0.39	1	PF00076	2	0.516208
Q5VWX1_KHDRBS2	18.59	0.39	1	-	0	0.516167
Q5F1R6_DNAJC21	18.58	0.39	1	PF12171,PF12874	2	0.516167
Q9BUQ8_DDX23	18.58	0.39	1	PF00270,PF00271	2	0.516167
Q9HC16_APOBEC3G	18.52	0.38	1	PF08210,PF05240	4	0.516
Q9UBQ5_EIF3K	18.51	0.38	1	-	0	0.515958
P46781_RPS9	18.5	0.38	1	PF01479,PF00163	2	0.515958
Q9NZ45_CISD1	18.5	0.38	1	-	0	0.515958
Q15185_PTGES3	18.49	0.38	1	-	0	0.515917
Q13435_SF3B2	18.48	0.38	1	PF04037,PF02037	2	0.515875
Q14692_BMS1	18.47	0.38	1	PF08142	1	0.515875
P37802_TAGLN2	18.41	0.38	1	-	0	0.515708
P46783_RPS10	18.36	0.37	1	PF03501	1	0.515583
Q9H3J6_C12orf65	18.35	0.37	1	PF00472	1	0.515542
Q9Y383_LUC7L2	18.35	0.37	1	PF03194	1	0.515542
P61081_UBE2M	18.34	0.37	1	-	0	0.515542
Q9Y5M8_SRPRB	18.32	0.37	1	PF01926	1	0.515458
O15235_MRPS12	18.31	0.37	1	PF00164	1	0.515458
Q86W42_THOC6	18.28	0.37	1	PF00400	1	0.515375
O60293_ZFC3H1	18.26	0.37	1	PF10650	1	0.515333
P03950_ANG	18.25	0.37	1	PF00074	1	0.515292
Q9HB71_CACYBP	18.24	0.37	1	-	0	0.51525
Q07020_RPL18	18.21	0.36	1	-	0	0.515208
Q8TAA1_RNASE11	18.19	0.36	1	PF00074	1	0.515125
O15541_RNF113A	18.18	0.36	1	PF00642,PF13923	2	0.515125
P17096_HMGA1	18.18	0.36	1	-	0	0.515125
Q07021_C1QBP	18.16	0.36	1	PF02330	1	0.515083
P62854_RPS26	18.15	0.36	1	PF01283	1	0.515042
Q9Y624_F11R	18.14	0.36	1	-	0	0.515
P10620_MGST1	18.13	0.36	1	-	0	0.515
O95218_ZRANB2	18.12	0.36	1	PF00641	2	0.514958
Q9NRX2_MRPL17	18.08	0.36	1	PF01196	1	0.514875
Q92945_KHSRP	18.04	0.35	1	PF00013,PF07650,PF09005	7	0.681417
O43395_PRPF3	18.02	0.35	1	PF08572,PF01480	2	0.514708
P84098_RPL19	18.02	0.35	1	PF01280	1	0.514708
Q3MHD2_LSM12	18	0.35	1	PF09793	1	0.514667
Q9H000_MKRN2	17.98	0.35	1	PF00642,PF14608,PF00097	4	0.514583
Q8N1G2_CMTR1	17.97	0.35	1	-	0	0.514583
Q86US8_SMG6	17.96	0.35	1	PF10373,PF13638,PF10374	3	0.514542
Q9UIF8_BAZ2B	17.96	0.35	1	PF01429	1	0.514542
P62888_RPL30	17.95	0.35	1	PF01248	1	0.5145
Q9Y2R9_MRPS7	17.95	0.35	1	PF00177	1	0.5145
Q9BSD7_NTPCR	17.92	0.35	1	-	0	0.514458
Q14197_MRPL58	17.91	0.35	1	PF00472	1	0.514417
Q9BXT4_TDRD1	17.91	0.35	1	PF00567	4	0.514417
Q96EY9_ADAT3	17.89	0.34	1	-	0	0.514375
P41252_IARS1	17.81	0.34	1	PF00133,PF08264,PF09334	3	0.514167
Q9UGP8_SEC63	17.76	0.34	1	-	0	0.514042
Q9HCS7_XAB2	17.73	0.34	1	-	0	0.513958
Q9UGY1_NOL12	17.71	0.33	1	PF09805	1	0.680583
Q8N9N8_EIF1AD	17.7	0.33	1	PF01176	1	0.513875
Q9GZS3_WDR61	17.7	0.33	1	PF00400,PF08662	4	0.513875
Q9Y3U8_RPL36	17.7	0.33	1	PF01158	1	0.513875
O00264_PGRMC1	17.69	0.33	1	-	0	0.513833
P42771_CDKN2A	17.68	0.33	1	-	0	0.513833
Q9NRR4_DROSHA	17.68	0.33	1	PF14622,PF00636,PF00035	5	0.513833
Q9ULC4_MCTS1	17.68	0.33	1	PF01472	1	0.513833
O95147_DUSP14	17.64	0.33	1	-	0	0.513708
Q16560_SNRNP35	17.62	0.33	1	PF00076	1	0.513667
Q9Y4Z0_LSM4	17.62	0.33	1	PF01423	1	0.513667
Q9H2W6_MRPL46	17.61	0.33	1	PF11788	1	0.513625
Q9NVU7_SDAD1	17.59	0.33	1	-	0	0.513583
Q9BTM9_URM1	17.57	0.32	1	PF09138	1	0.513542
P38646_HSPA9	17.53	0.32	1	PF02782	1	0.513417
P04114_APOB	17.52	0.32	1	-	0	0.513417
Q659C4_LARP1B	17.52	0.32	1	PF05383	1	0.513417
O75683_SURF6	17.51	0.32	1	PF04935	1	0.513375
Q7Z2W9_MRPL21	17.48	0.32	1	PF00829	1	0.513292
O00566_MPHOSPH10	17.45	0.32	1	PF04006	1	0.513208
Q9ULW0_TPX2	17.44	0.32	1	-	0	0.513208
Q9Y3A4_RRP7A	17.44	0.32	1	PF12923,PF00076	2	0.513208
P62280_RPS11	17.41	0.32	1	PF00366	1	0.513125
Q96B26_EXOSC8	17.4	0.31	1	PF01138,PF03725	2	0.513083
O43719_HTATSF1	17.39	0.31	1	PF00076	2	0.513083
Q9Y534_CSDC2	17.39	0.31	1	PF00313	1	0.513083
Q8WXH0_SYNE2	17.37	0.31	1	-	0	0.513
P05386_RPLP1	17.36	0.31	1	PF00428	1	0.513
Q00839_HNRNPU	17.35	0.31	1	PF13671,PF00622,PF02037	3	0.512958
Q96AZ6_ISG20	17.35	0.31	1	PF00929	1	0.512958
Q86UA1_PRPF39	17.31	0.31	1	-	0	0.512875
O14776_TCERG1	17.29	0.31	1	-	0	0.512792
Q9UBP6_METTL1	17.29	0.31	1	-	0	0.512792
Q16637_SMN1	17.27	0.31	1	PF06003	1	0.51275
Q5T0F9_CC2D1B	17.27	0.31	1	-	0	0.51275
Q9H501_ESF1	17.27	0.31	1	PF08159	1	0.51275
Q5RKV6_EXOSC6	17.26	0.31	1	PF01138	1	0.51275
Q96FV9_THOC1	17.26	0.31	1	PF11957	1	0.51275
Q9NZJ5_EIF2AK3	17.23	0.3	1	-	0	0.512667
Q9H2H8_PPIL3	17.22	0.3	1	PF00160	1	0.512625
Q96G21_IMP4	17.19	0.3	1	PF04427	1	0.512542
P53597_SUCLG1	17.17	0.3	1	-	0	0.5125
Q9NZE8_MRPL35	17.17	0.3	1	PF01632	1	0.5125
O75569_PRKRA	17.15	0.3	1	PF00035	2	0.512458
Q9BQ67_GRWD1	17.15	0.3	1	PF00400,PF12265	3	0.512458
P31689_DNAJA1	17.12	0.3	1	-	0	0.512375
Q9Y450_HBS1L	17.11	0.3	1	PF00009,PF03143,PF03144	3	0.512333
Q9Y6Y8_SEC23IP	17.11	0.3	1	-	0	0.512333
Q9H633_RPP21	17.08	0.29	1	PF04032	1	0.51225
P62633_CNBP	17.05	0.29	1	PF00098	7	0.512167
Q8N5L8_RPP25L	17.05	0.29	1	PF01918	1	0.512167
P25786_PSMA1	17.04	0.29	1	-	0	0.512167
Q9UJU6_DBNL	17.02	0.29	1	-	0	0.512125
A6NNA2_SRRM3	16.99	0.29	1	PF15230,PF08312	2	0.512042
Q13769_THOC5	16.99	0.29	1	-	0	0.512042
Q8IXT5_RBM12B	16.97	0.29	1	PF00076	2	0.512
Q96C10_DHX58	16.97	0.29	1	-	0	0.512
P82932_MRPS6	16.96	0.29	1	PF01250	1	0.511958
P57678_GEMIN4	16.94	0.29	1	-	0	0.511917
Q7KZ85_SUPT6H	16.93	0.28	1	PF00575	1	0.511875
Q14152_EIF3A	16.92	0.28	1	-	0	0.511833
O95707_POP4	16.89	0.28	1	PF01868	1	0.511792
Q7Z6E9_RBBP6	16.88	0.28	1	PF13696,PF00098	2	0.51175
P78332_RBM6	16.87	0.28	1	PF01585	1	0.511708
Q96FQ6_S100A16	16.87	0.28	1	-	0	0.511708
Q9BW92_TARS2	16.87	0.28	1	PF00587,PF03129,PF07973	3	0.511708
Q32MZ4_LRRFIP1	16.85	0.28	1	PF09738	1	0.511667
Q86Y13_DZIP3	16.85	0.28	1	PF13639,PF13923,PF00097	3	0.511667
Q9BXT8_RNF17	16.85	0.28	1	PF00567	5	0.511667
Q9NP77_SSU72	16.85	0.28	1	PF04722	1	0.511667
P13010_XRCC5	16.82	0.28	1	PF03731,PF02735,PF03730	3	0.511583
P62841_RPS15	16.76	0.27	1	PF00203	1	0.511417
Q16594_TAF9	16.74	0.27	1	-	0	0.511375
P82914_MRPS15	16.69	0.27	1	PF00312	1	0.51125
Q99700_ATXN2	16.69	0.27	1	PF14438,PF06741,PF07145	3	0.51125
Q14241_ELOA	16.67	0.27	1	-	0	0.511208
Q5JPI9_EEF1AKMT2	16.67	0.27	1	PF13847,PF05175	2	0.511208
Q8TBZ6_TRMT10A	16.67	0.27	1	PF01746	1	0.511208
Q9Y3T9_NOC2L	16.66	0.27	1	PF03715	1	0.511167
P47914_RPL29	16.64	0.27	1	PF01779	1	0.511125
Q9P287_BCCIP	16.63	0.27	1	PF13862	1	0.511083
Q9UHA3_RSL24D1	16.63	0.27	1	PF01246	1	0.511083
Q7Z333_SETX	16.62	0.27	1	PF13086,PF13087,PF13245,PF00580	4	0.511083
Q8WUM4_PDCD6IP	16.62	0.27	1	-	0	0.511083
O14980_XPO1	16.6	0.26	1	PF08767,PF08389,PF03810	3	0.511042
Q9H814_PHAX	16.6	0.26	1	-	0	0.511042
P05387_RPLP2	16.58	0.26	1	PF00428	1	0.510958
Q9UNX4_WDR3	16.56	0.26	1	PF00400,PF04003	5	0.510917
Q14980_NUMA1	16.55	0.26	1	-	0	0.510875
Q96NC0_ZMAT2	16.54	0.26	1	PF12171,PF12874,PF06220	3	0.510875
O94804_STK10	16.53	0.26	1	-	0	0.510833
Q96E11_MRRF	16.53	0.26	1	PF01765	1	0.510833
Q9UKF6_CPSF3	16.53	0.26	1	PF11718,PF10996,PF00753,PF07521	4	0.510833
P62316_SNRPD2	16.48	0.26	1	PF01423	1	0.510708
Q14146_URB2	16.47	0.26	1	PF10441	1	0.510667
P20810_CAST	16.44	0.26	1	-	0	0.510625
Q8IYL2_TRMT44	16.44	0.26	1	PF07757	1	0.510625
Q9P2E9_RRBP1	16.42	0.25	1	-	0	0.510542
Q01974_ROR2	16.41	0.25	1	-	0	0.510542
Q05682_CALD1	16.41	0.25	1	-	0	0.510542
P10412_H1-4	16.4	0.25	1	-	0	0.5105
Q6P5R6_RPL22L1	16.4	0.25	1	PF01776	1	0.5105
Q8IX12_CCAR1	16.4	0.25	1	PF14444,PF02037	2	0.5105
P04792_HSPB1	16.39	0.25	1	-	0	0.510458
P27816_MAP4	16.39	0.25	1	-	0	0.510458
P07195_LDHB	16.37	0.25	1	-	0	0.510417
Q9BXY0_MAK16	16.37	0.25	1	PF01778	1	0.510417
Q9NX24_NHP2	16.36	0.25	1	PF01248	1	0.510417
Q86TS9_MRPL52	16.35	0.25	1	-	0	0.510375
Q9UPR6_ZFR2	16.35	0.25	1	PF07528,PF12874	3	0.510375
Q14004_CDK13	16.34	0.25	1	-	0	0.510333
P62993_GRB2	16.33	0.25	1	-	0	0.510333
Q9P258_RCC2	16.31	0.25	1	-	0	0.51025
Q53GS7_GLE1	16.28	0.24	1	PF07817	1	0.510208
Q6NWY9_PRPF40B	16.27	0.24	1	-	0	0.510167
Q9NQI0_DDX4	16.27	0.24	1	PF00270,PF00271	2	0.510167
Q9H9Y2_RPF1	16.25	0.24	1	PF04427	1	0.510125
P07305_H1-0	16.23	0.24	1	-	0	0.510083
Q9NVN8_GNL3L	16.21	0.24	1	PF01926	1	0.51
Q16836_HADH	16.19	0.24	1	-	0	0.509958
Q9H1E3_NUCKS1	16.19	0.24	1	-	0	0.509958
P62241_RPS8	16.18	0.24	1	PF01201	1	0.509917
Q13206_DDX10	16.17	0.24	1	PF00270,PF00271,PF13959,PF04851	4	0.509917
Q3MIT2_PUS10	16.16	0.24	1	-	0	0.509875
Q8WUH6_TMEM263	16.16	0.24	1	-	0	0.509875
Q96QE5_TEFM	16.16	0.24	1	-	0	0.509875
O15037_KHNYN	16.15	0.24	1	PF11977	1	0.509875
O77932_DXO	16.15	0.24	1	PF08652	1	0.509875
P0C7T5_ATXN1L	16.14	0.24	1	PF08517	1	0.509833
P50914_RPL14	16.14	0.24	1	PF01929	1	0.509833
Q86UP2_KTN1	16.14	0.24	1	-	0	0.509833
O14602_EIF1AY	16.13	0.24	1	PF01176	1	0.509792
Q86UR5_RIMS1	16.1	0.23	1	-	0	0.509708
Q9UMY1_NOL7	16.1	0.23	1	PF08157	1	0.509708
Q9HCE1_MOV10	16.09	0.23	1	PF13087,PF13086,PF13604,PF13245,PF04851	6	0.509708
P18621_RPL17	16.08	0.23	1	PF00237	1	0.509667
Q9BYX4_IFIH1	16.08	0.23	1	-	0	0.509667
P83731_RPL24	16.05	0.23	1	PF01246	1	0.509583
Q9UI17_DMGDH	16.05	0.23	1	-	0	0.509583
Q14151_SAFB2	16.02	0.23	1	PF00076,PF02037	2	0.5095
P15924_DSP	16.01	0.23	1	-	0	0.5095
P99999_CYCS	16.01	0.23	1	-	0	0.5095
P47813_EIF1AX	16	0.23	1	PF01176	1	0.509458
A4D1E9_GTPBP10	15.99	0.23	1	PF01926	1	0.509458
O60870_KIN	15.98	0.23	1	PF10357	1	0.509417
P18124_RPL7	15.98	0.23	1	PF08079,PF00327	2	0.509417
Q9UI26_IPO11	15.95	0.22	1	PF03810	1	0.509333
Q9Y6K5_OAS3	15.93	0.22	1	PF10421	3	0.509292
O75940_SMNDC1	15.92	0.22	1	PF06003	1	0.50925
Q14320_FAM50A	15.92	0.22	1	-	0	0.50925
Q8N9W6_BOLL	15.88	0.22	1	-	0	0.509167
P62750_RPL23A	15.86	0.22	1	PF03939,PF00276	2	0.509083
Q9BXU3_TEX13A	15.82	0.22	1	-	0	0.509
Q9BX66_SORBS1	15.81	0.22	1	-	0	0.508958
Q8WYQ5_DGCR8	15.8	0.22	1	-	0	0.508958
P84103_SRSF3	15.78	0.21	1	PF00076	1	0.84225
Q9BYD2_MRPL9	15.78	0.21	1	PF01281	1	0.508917
P24043_LAMA2	15.77	0.21	1	-	0	0.508875
Q6DKI1_RPL7L1	15.76	0.21	1	PF08079,PF00327	2	0.508833
Q9NXW2_DNAJB12	15.76	0.21	1	-	0	0.508833
Q13144_EIF2B5	15.74	0.21	1	PF02020	1	0.508792
Q15424_SAFB	15.73	0.21	1	PF00076,PF02037,PF13893	3	0.50875
Q9UL40_ZNF346	15.72	0.21	1	PF12874	3	0.842083
P20042_EIF2S2	15.72	0.21	1	PF01873	1	0.50875
Q10589_BST2	15.72	0.21	1	-	0	0.50875
Q14147_DHX34	15.72	0.21	1	PF04408,PF00271	2	0.50875
Q5BKZ1_ZNF326	15.72	0.21	1	PF04988	1	0.50875
O43768_ENSA	15.7	0.21	1	-	0	0.508708
Q14232_EIF2B1	15.7	0.21	1	PF01008	1	0.508708
Q8TEX9_IPO4	15.7	0.21	1	PF03810	1	0.508708
Q9NPI6_DCP1A	15.68	0.21	1	PF06058	1	0.508625
P09234_SNRPC	15.67	0.21	1	PF06220	1	0.508625
P0CG48_UBC	15.67	0.21	1	-	0	0.508625
Q6ZT89_SLC25A48	15.67	0.21	1	-	0	0.508625
P55795_HNRNPH2	15.66	0.21	1	PF00076,PF08080	4	0.67525
O95478_NSA2	15.65	0.2	1	PF01201	1	0.508542
Q12996_CSTF3	15.65	0.2	1	PF05843	1	0.508542
Q9Y676_MRPS18B	15.63	0.2	1	PF01084	1	0.5085
P62487_POLR2G	15.62	0.2	1	PF00575,PF03876	2	0.5085
P36915_GNL1	15.61	0.2	1	PF01926	1	0.508458
Q9Y324_FCF1	15.61	0.2	1	PF04900	1	0.508458
Q92888_ARHGEF1	15.6	0.2	1	-	0	0.508417
Q9P2J5_LARS1	15.6	0.2	1	PF00133,PF09334,PF08264,PF01406	6	0.508417
Q05209_PTPN12	15.58	0.2	1	-	0	0.508375
Q969X6_UTP4	15.57	0.2	1	-	0	0.508333
O75380_NDUFS6	15.56	0.2	1	-	0	0.508333
P30876_POLR2B	15.56	0.2	1	PF00562,PF04563,PF04561,PF04560,PF04566,PF04565,PF04567	7	0.508333
Q9Y580_RBM7	15.56	0.2	1	PF00076,PF13893	2	0.508333
Q9BRJ2_MRPL45	15.55	0.2	1	-	0	0.508292
Q9BYD1_MRPL13	15.54	0.2	1	PF00572	1	0.508292
Q6NZI2_CAVIN1	15.53	0.2	1	-	0	0.50825
Q9BSC4_NOL10	15.52	0.2	1	PF08159	1	0.508208
O43896_KIF1C	15.51	0.2	1	PF00498	1	0.508208
P67809_YBX1	15.5	0.2	1	PF00313	1	0.508167
P49588_AARS1	15.49	0.2	1	PF01411,PF02272,PF07973	3	0.508125
Q92616_GCN1	15.48	0.2	1	-	0	0.508125
Q9C0C9_UBE2O	15.47	0.19	1	-	0	0.508083
O14647_CHD2	15.44	0.19	1	PF00176,PF00271,PF04851	3	0.508
P62995_TRA2B	15.44	0.19	1	PF00076	1	0.508
Q8IWX8_CHERP	15.44	0.19	1	PF01805,PF01585	2	0.508
O75792_RNASEH2A	15.43	0.19	1	PF01351	1	0.508
Q12872_SFSWAP	15.42	0.19	1	PF09750,PF01805	3	0.507958
P26583_HMGB2	15.41	0.19	1	-	0	0.507958
P09001_MRPL3	15.4	0.19	1	PF00297	2	0.507917
P51825_AFF1	15.4	0.19	1	PF05110	1	0.507917
Q96EY7_PTCD3	15.4	0.19	1	-	0	0.507917
Q99575_POP1	15.4	0.19	1	PF06978,PF08170	3	0.507917
P52298_NCBP2	15.39	0.19	1	PF00076	1	0.674542
Q96KR1_ZFR	15.39	0.19	1	PF07528,PF12874	4	0.507875
Q9UIG0_BAZ1B	15.39	0.19	1	-	0	0.507875
P05204_HMGN2	15.38	0.19	1	-	0	0.507875
Q9UBB9_TFIP11	15.38	0.19	1	PF01585	1	0.507875
Q8IX01_SUGP2	15.37	0.19	1	PF01805,PF01585	2	0.507833
Q9Y5B9_SUPT16H	15.27	0.18	1	PF00557	1	0.507583
P60323_NANOS3	15.25	0.18	1	PF05741	1	0.507542
Q9Y4Y9_LSM5	15.25	0.18	1	PF01423	1	0.507542
Q13439_GOLGA4	15.24	0.18	1	-	0	0.5075
Q8WY41_NANOS1	15.24	0.18	1	PF05741	1	0.5075
Q96HW7_INTS4	15.22	0.18	1	-	0	0.507458
Q86VP6_CAND1	15.21	0.18	1	-	0	0.507417
Q92900_UPF1	15.2	0.18	1	PF09416,PF13087,PF13086,PF13604,PF13245,PF04851	7	0.674042
Q8TF46_DIS3L	15.2	0.18	1	PF00773	1	0.507375
Q96DI7_SNRNP40	15.19	0.18	1	PF00400	6	0.507375
P50750_CDK9	15.18	0.18	1	-	0	0.507333
Q92834_RPGR	15.14	0.17	1	-	0	0.50725
P49589_CARS1	15.13	0.17	1	PF01406	1	0.507208
P46459_NSF	15.11	0.17	1	-	0	0.507167
Q9UKV3_ACIN1	15.11	0.17	1	PF02037	1	0.507167
P55196_AFDN	15.09	0.17	1	PF00498	1	0.507125
Q5T5J6_SWT1	15.09	0.17	1	PF13638	1	0.507125
Q92904_DAZL	15.09	0.17	1	PF00076	1	0.507125
O60522_TDRD6	15.08	0.17	1	PF00567	7	0.507083
O60716_CTNND1	15.07	0.17	1	-	0	0.507042
Q5RL73_RBM48	15.07	0.17	1	-	0	0.507042
Q8IY21_DDX60	15.07	0.17	1	PF00270,PF04851,PF00271	3	0.507042
O75152_ZC3H11A	15.06	0.17	1	-	0	0.507042
Q15459_SF3A1	15.05	0.17	1	PF12230,PF01805	3	0.507
Q7L7V1_DHX32	15.04	0.17	1	PF04408	1	0.507
Q96JY0_MAEL	15.02	0.17	1	PF13017	1	0.506917
O75113_N4BP1	15.01	0.17	1	PF11977	1	0.506917
P62318_SNRPD3	15.01	0.17	1	PF01423	1	0.506917
P62857_RPS28	15.01	0.17	1	PF01200	1	0.506917
P30086_PEBP1	15	0.16	1	-	0	0.506875
P31943_HNRNPH1	15	0.16	1	PF00076,PF08080	4	0.506875
Q7Z3Z4_PIWIL4	15	0.16	1	PF02171,PF02170	2	0.506875
Q8NHU6_TDRD7	15	0.16	1	PF00567	3	0.506875
P58107_EPPK1	14.98	0.16	1	-	0	0.506833
Q7L014_DDX46	14.98	0.16	1	PF00270,PF00271	2	0.506833
Q15149_PLEC	14.96	0.16	1	PF03501	1	0.506792
Q8N6N3_C1orf52	14.95	0.16	1	-	0	0.50675
Q9H0U6_MRPL18	14.95	0.16	1	PF00861	1	0.50675
Q99848_EBNA1BP2	14.93	0.16	1	PF05890	1	0.506708
P23284_PPIB	14.92	0.16	1	PF00160	1	0.506667
Q9NVR2_INTS10	14.92	0.16	1	-	0	0.506667
P04054_PLA2G1B	14.91	0.16	1	-	0	0.506625
Q01082_SPTBN1	14.91	0.16	1	-	0	0.506625
Q9NR30_DDX21	14.9	0.16	1	PF00270,PF00271,PF08152,PF04851	4	0.506625
O75116_ROCK2	14.89	0.16	1	-	0	0.506583
Q9NTZ6_RBM12	14.89	0.16	1	PF00076	3	0.506583
Q15397_PUM3	14.88	0.16	1	PF08144	1	0.506583
Q7KZF4_SND1	14.87	0.16	1	PF00565,PF00567	6	0.673208
P63272_SUPT4H1	14.87	0.16	1	PF06093	1	0.506542
Q92620_DHX38	14.87	0.16	1	PF04408,PF00271,PF00270	3	0.506542
Q99459_CDC5L	14.87	0.16	1	PF11831	1	0.506542
P13639_EEF2	14.85	0.16	1	PF00009,PF03764,PF00679,PF03144,PF01926	5	0.5065
P51116_FXR2	14.85	0.16	1	PF12235,PF00013,PF05641	4	0.5065
Q9UPQ9_TNRC6B	14.85	0.16	1	PF10427	1	0.5065
P11586_MTHFD1	14.84	0.16	1	-	0	0.506458
Q9NQE9_HINT3	14.84	0.16	1	PF11969	1	0.506458
O14562_UBFD1	14.83	0.15	1	-	0	0.506417
P49458_SRP9	14.83	0.15	1	PF05486	1	0.506417
Q14011_CIRBP	14.82	0.15	1	PF00076	1	0.506417
Q8N5C6_SRBD1	14.8	0.15	1	PF00575	1	0.506375
Q5VYS8_TUT7	14.75	0.15	1	PF03828,PF00098	4	0.506208
Q92667_AKAP1	14.75	0.15	1	PF00567,PF00013	2	0.506208
Q8NDD1_C1orf131	14.73	0.15	1	-	0	0.506167
Q08J23_NSUN2	14.71	0.15	1	PF01189	1	0.506125
Q29RF7_PDS5A	14.69	0.15	1	-	0	0.506083
Q8N3C0_ASCC3	14.69	0.15	1	PF00270,PF04851,PF00271	6	0.506083
Q9Y3B4_SF3B6	14.69	0.15	1	PF00076	1	0.506083
O43491_EPB41L2	14.68	0.14	1	-	0	0.506042
Q9H307_PNN	14.66	0.14	1	-	0	0.506
Q9UHB7_AFF4	14.65	0.14	1	PF05110	1	0.505958
P11387_TOP1	14.64	0.14	1	-	0	0.505958
Q6NXG1_ESRP1	14.64	0.14	1	-	0	0.505958
Q7Z406_MYH14	14.64	0.14	1	-	0	0.505958
P62312_LSM6	14.63	0.14	1	PF01423	1	0.505917
Q5JSQ8_KHDC1L	14.62	0.14	1	-	0	0.505875
P62310_LSM3	14.6	0.14	1	PF01423	1	0.505833
Q96BP3_PPWD1	14.6	0.14	1	PF00160	1	0.505833
P49792_RANBP2	14.57	0.14	1	PF00641,PF00160	9	0.50575
Q6PKG0_LARP1	14.57	0.14	1	PF05383	1	0.50575
Q9HBE1_PATZ1	14.57	0.14	1	PF00096	2	0.50575
Q13247_SRSF6	14.56	0.14	1	PF00076	2	0.50575
Q96BP2_CHCHD1	14.56	0.14	1	-	0	0.50575
P62304_SNRPE	14.55	0.14	1	PF01423	1	0.505708
P98175_RBM10	14.55	0.14	1	PF01585,PF00076,PF12656,PF00641	4	0.505708
Q16762_TST	14.54	0.14	1	-	0	0.505667
Q9NRC6_SPTBN5	14.54	0.14	1	-	0	0.505667
P62424_RPL7A	14.52	0.14	1	PF01248	1	0.505625
Q01780_EXOSC10	14.52	0.14	1	PF01612,PF08066,PF00570	3	0.505625
Q8NEZ4_KMT2C	14.52	0.14	1	-	0	0.505625
Q9NUK0_MBNL3	14.52	0.14	1	PF00642	1	0.505625
Q9P2M7_CGN	14.52	0.14	1	-	0	0.505625
Q92499_DDX1	14.51	0.14	1	PF00270,PF00271,PF00622	3	0.505625
Q9BYK8_HELZ2	14.51	0.14	1	PF13086,PF13087,PF00773,PF13245	6	0.505625
P30048_PRDX3	14.5	0.13	1	-	0	0.505583
Q8N5U6_RNF10	14.5	0.13	1	PF13639,PF00097	2	0.505583
O43432_EIF4G3	14.49	0.13	1	PF02854,PF02847,PF02020	3	0.505542
O60306_AQR	14.49	0.13	1	PF13086,PF13087,PF13245,PF04851	4	0.505542
Q05707_COL14A1	14.47	0.13	1	-	0	0.5055
Q8IX18_DHX40	14.47	0.13	1	PF04408,PF00271,PF00270	3	0.5055
P10515_DLAT	14.46	0.13	1	-	0	0.505458
Q8TF01_PNISR	14.45	0.13	1	-	0	0.505458
P48634_PRRC2A	14.44	0.13	1	-	0	0.505417
Q08211_DHX9	14.44	0.13	1	PF00035,PF00271,PF04408,PF00270	5	0.505417
Q8N163_CCAR2	14.44	0.13	1	PF14444	1	0.505417
Q9Y6M1_IGF2BP2	14.43	0.13	1	PF00013,PF00076	6	0.505417
P08865_RPSA	14.42	0.13	1	PF00318	2	0.505375
Q8N0Z8_PUSL1	14.42	0.13	1	PF01416	2	0.505375
Q96GQ7_DDX27	14.42	0.13	1	PF00270,PF00271,PF04851	3	0.505375
P09327_VIL1	14.41	0.13	1	-	0	0.505333
Q9H0G5_NSRP1	14.4	0.13	1	PF09745	1	0.505333
A6NMX2_EIF4E1B	14.39	0.13	1	PF01652	1	0.505292
P15559_NQO1	14.39	0.13	1	-	0	0.505292
Q9UHB6_LIMA1	14.38	0.13	1	-	0	0.50525
P29728_OAS2	14.37	0.13	1	PF10421	2	0.50525
P55060_CSE1L	14.36	0.12	1	PF03810	1	0.505208
O43823_AKAP8	14.35	0.12	1	PF04988	1	0.505208
Q15691_MAPRE1	14.33	0.12	1	-	0	0.505125
Q92797_SYMPK	14.32	0.12	1	PF12295	1	0.505125
P55072_VCP	14.31	0.12	1	-	0	0.505083
Q6IMN6_CAPRIN2	14.3	0.12	1	PF12287	1	0.505042
Q9Y2W1_THRAP3	14.29	0.12	1	PF15440	1	0.505042
P21399_ACO1	14.28	0.12	1	PF00330,PF00694	2	0.505
Q9H777_ELAC1	14.28	0.12	1	PF00753,PF13691	2	0.505
Q9H9P5_UNKL	14.28	0.12	1	PF00642	1	0.505
P04040_CAT	14.27	0.12	1	-	0	0.505
P20618_PSMB1	14.27	0.12	1	-	0	0.505
O60294_LCMT2	14.26	0.12	1	-	0	0.504958
Q9NVR5_DNAAF2	14.25	0.12	1	PF08190	1	0.504917
P35221_CTNNA1	14.22	0.12	1	-	0	0.504875
Q9H6R4_NOL6	14.22	0.12	1	PF03813	1	0.504875
Q96J94_PIWIL1	14.21	0.12	1	-	0	0.504833
Q9Y333_LSM2	14.2	0.12	1	PF01423	1	0.504792
B5MCY1_TDRD15	14.19	0.12	1	PF00567	8	0.504792
O75643_SNRNP200	14.18	0.11	1	PF00270,PF04851,PF00271	5	0.50475
P46199_MTIF2	14.17	0.11	1	PF00009,PF11987,PF01926	3	0.504708
Q7Z478_DHX29	14.14	0.11	1	PF04408,PF00271,PF00270	3	0.504667
Q969S9_GFM2	14.11	0.11	1	PF00009,PF00679,PF03764,PF03144	4	0.504583
O75367_MACROH2A1	14.1	0.11	1	-	0	0.504542
P62937_PPIA	14.1	0.11	1	PF00160	1	0.504542
O60287_URB1	14.09	0.11	1	PF11707	1	0.5045
P35544_FAU	14.09	0.11	1	-	0	0.5045
P42694_HELZ	14.09	0.11	1	PF13087,PF13086,PF13604,PF13245,PF00642	6	0.5045
Q9NQM4_DNAAF6	14.09	0.11	1	-	0	0.5045
Q9Y2Z2_MTO1	14.08	0.11	1	PF13932	1	0.5045
P16402_H1-3	14.07	0.11	1	-	0	0.504458
Q5T653_MRPL2	14.07	0.11	1	PF03947,PF00181	2	0.504458
P11171_EPB41	14.04	0.1	1	-	0	0.504375
Q04637_EIF4G1	14.04	0.1	1	PF02854,PF02847,PF02020	3	0.504375
Q9BXT6_MOV10L1	14.03	0.1	1	PF13087,PF13086,PF13604	4	0.504375
O76094_SRP72	14.02	0.1	1	PF08492	1	0.504333
Q96QU8_XPO6	14.02	0.1	1	PF08389,PF03810	2	0.504333
Q9BQ39_DDX50	14.02	0.1	1	PF00270,PF00271,PF08152,PF04851	4	0.504333
Q9BVJ6_UTP14A	14.02	0.1	1	PF04615	1	0.504333
Q9BXJ9_NAA15	14.02	0.1	1	PF13181	1	0.504333
Q9UEY8_ADD3	14.01	0.1	1	-	0	0.504292
Q6NUQ4_TMEM214	14	0.1	1	-	0	0.504292
P11021_HSPA5	13.97	0.1	1	-	0	0.504208
Q14690_PDCD11	13.97	0.1	1	PF00575,PF05843	5	0.504208
Q6ZU64_CFAP65	13.97	0.1	1	-	0	0.504208
P53803_POLR2K	13.96	0.1	1	PF03604	1	0.504167
O14717_TRDMT1	13.95	0.1	1	-	0	0.504167
P78362_SRPK2	13.94	0.1	1	-	0	0.504125
Q99676_ZNF184	13.94	0.1	1	-	0	0.504125
O43148_RNMT	13.93	0.1	1	PF03291,PF13847	2	0.504083
Q92979_EMG1	13.93	0.1	1	PF03587	1	0.504083
Q8NDT2_RBM15B	13.92	0.1	1	PF07744,PF00076	3	0.504083
Q9NQT5_EXOSC3	13.92	0.1	1	-	0	0.504083
Q5BKY9_FAM133B	13.91	0.1	1	-	0	0.504042
Q9NV88_INTS9	13.91	0.1	1	-	0	0.504042
Q2M296_MTHFSD	13.89	0.1	1	PF00076	1	0.504
P05023_ATP1A1	13.88	0.1	1	-	0	0.503958
Q7Z417_NUFIP2	13.88	0.1	1	PF15293	1	0.503958
O75347_TBCA	13.86	0.09	1	-	0	0.503917
Q12926_ELAVL2	13.86	0.09	1	PF00076,PF13893	4	0.503917
Q14562_DHX8	13.86	0.09	1	PF04408,PF00575,PF00271	3	0.503917
P36954_POLR2I	13.84	0.09	1	PF02150	1	0.503875
Q9NXG2_THUMPD1	13.84	0.09	1	PF02926	1	0.503875
Q8WW36_ZCCHC13	13.83	0.09	1	PF00098	4	0.503833
P62277_RPS13	13.81	0.09	1	PF08069,PF00312	2	0.503792
Q14137_BOP1	13.81	0.09	1	PF08145,PF00400	3	0.503792
Q8NI27_THOC2	13.81	0.09	1	PF11262,PF11732	2	0.503792
Q96SD1_DCLRE1C	13.77	0.09	1	-	0	0.503708
Q9BWJ5_SF3B5	13.74	0.09	1	PF07189	1	0.503625
Q5JTZ9_AARS2	13.73	0.09	1	PF01411,PF07973	2	0.503583
Q92973_TNPO1	13.71	0.08	1	PF03810	1	0.503542
O14787_TNPO2	13.7	0.08	1	PF03810	1	0.5035
O15397_IPO8	13.69	0.08	1	PF03810	1	0.5035
O95684_CEP43	13.69	0.08	1	-	0	0.5035
Q9BSH4_TACO1	13.69	0.08	1	-	0	0.5035
O75400_PRPF40A	13.68	0.08	1	-	0	0.503458
Q05193_DNM1	13.68	0.08	1	-	0	0.503458
Q02040_AKAP17A	13.67	0.08	1	-	0	0.503417
Q14CZ7_FASTKD3	13.67	0.08	1	PF08368,PF08373,PF06743	3	0.503417
Q00610_CLTC	13.66	0.08	1	-	0	0.503417
Q15477_SKIV2L	13.66	0.08	1	PF13234,PF00270,PF00271	3	0.503417
Q9C0E2_XPO4	13.66	0.08	1	-	0	0.503417
O60936_NOL3	13.64	0.08	1	-	0	0.503333
Q14676_MDC1	13.64	0.08	1	PF00498	1	0.503333
Q13868_EXOSC2	13.62	0.08	1	PF14382	1	0.503292
P06730_EIF4E	13.59	0.08	1	PF01652	1	0.503208
P43243_MATR3	13.59	0.08	1	-	0	0.503208
Q9NX20_MRPL16	13.59	0.08	1	PF00252	1	0.503208
Q4VXA5_KHDC1	13.58	0.08	1	-	0	0.503208
O75525_KHDRBS3	13.57	0.08	1	PF00013	1	0.503167
Q99598_TSNAX	13.57	0.08	1	PF01997	1	0.503167
P00338_LDHA	13.55	0.08	1	-	0	0.503125
P26378_ELAVL4	13.55	0.08	1	-	0	0.503125
Q71UM5_RPS27L	13.55	0.08	1	PF01667	1	0.503125
Q14576_ELAVL3	13.54	0.07	1	PF00076,PF13893	4	0.503083
Q16891_IMMT	13.53	0.07	1	-	0	0.503083
O43709_BUD23	13.52	0.07	1	-	0	0.503042
Q9NW13_RBM28	13.52	0.07	1	PF00076	3	0.503042
Q92541_RTF1	13.51	0.07	1	-	0	0.503
P60321_NANOS2	13.5	0.07	1	PF05741	1	0.503
P16383_GCFC2	13.49	0.07	1	-	0	0.502958
Q05823_RNASEL	13.49	0.07	1	-	0	0.502958
Q15007_WTAP	13.49	0.07	1	-	0	0.502958
Q92974_ARHGEF2	13.49	0.07	1	-	0	0.502958
Q9Y5G4_PCDHGA9	13.49	0.07	1	-	0	0.502958
Q9Y2L1_DIS3	13.47	0.07	1	PF00773,PF13638	2	0.502917
Q7Z2T5_TRMT1L	13.46	0.07	1	PF02005,PF02475	3	0.502875
Q8NAT2_TDRD5	13.46	0.07	1	PF00567	1	0.502875
Q9C0B0_UNK	13.46	0.07	1	PF00642	1	0.502875
Q9UJC3_HOOK1	13.46	0.07	1	-	0	0.502875
Q8WTT2_NOC3L	13.45	0.07	1	PF03914,PF07540	2	0.502875
Q9C0C2_TNKS1BP1	13.45	0.07	1	-	0	0.502875
Q9NV66_TYW1	13.45	0.07	1	PF08608	1	0.502875
O95373_IPO7	13.43	0.07	1	PF03810	1	0.502792
Q96GC5_MRPL48	13.43	0.07	1	PF00338	1	0.502792
P48200_IREB2	13.42	0.07	1	PF00330,PF00694	3	0.502792
P42704_LRPPRC	13.4	0.07	1	-	0	0.50275
Q69YN4_VIRMA	13.4	0.07	1	-	0	0.50275
Q6ZRY4_RBPMS2	13.4	0.07	1	PF00076	1	0.50275
Q9P127_LUZP4	13.39	0.06	1	-	0	0.502708
P26639_TARS1	13.38	0.06	1	PF00587,PF03129,PF07973	3	0.502667
Q6P9B9_INTS5	13.38	0.06	1	PF14838,PF14837	2	0.502667
P22314_UBA1	13.37	0.06	1	-	0	0.502667
Q9Y520_PRRC2C	13.37	0.06	1	-	0	0.502667
Q96T58_SPEN	13.36	0.06	1	PF00076,PF07744	5	0.502625
Q9H2Y7_ZNF106	13.36	0.06	1	-	0	0.502625
Q2NL82_TSR1	13.35	0.06	1	PF08142	1	0.502583
Q9NR48_ASH1L	13.34	0.06	1	-	0	0.502583
P53618_COPB1	13.33	0.06	1	-	0	0.502542
Q6P3W6_NBPF10	13.33	0.06	1	-	0	0.502542
Q9Y3A5_SBDS	13.33	0.06	1	PF09377,PF01172	2	0.502542
P07108_DBI	13.32	0.06	1	-	0	0.502542
Q5T440_IBA57	13.32	0.06	1	-	0	0.502542
Q9NYL2_MAP3K20	13.32	0.06	1	-	0	0.502542
O15372_EIF3H	13.31	0.06	1	PF01398	1	0.5025
Q9H0J9_PARP12	13.31	0.06	1	PF00644,PF00642	2	0.5025
Q8TCS8_PNPT1	13.3	0.06	1	PF01138,PF03725,PF03726,PF00013,PF00575	6	0.502458
P62942_FKBP1A	13.29	0.06	1	PF00254	1	0.502458
Q6ZP01_RBM44	13.28	0.06	1	PF00076	1	0.502417
P62273_RPS29	13.27	0.06	1	PF00253	1	0.502375
Q9UHI6_DDX20	13.27	0.06	1	PF00270,PF00271,PF04851	3	0.502375
Q13813_SPTAN1	13.26	0.06	1	-	0	0.502375
O60841_EIF5B	13.24	0.06	1	PF00009,PF11987,PF03144,PF01926	4	0.502333
O43143_DHX15	13.23	0.06	1	PF04408,PF00271,PF00270	3	0.502292
O75534_CSDE1	13.23	0.06	1	PF00313,PF12901	6	0.502292
P78316_NOP14	13.22	0.05	1	PF04147	1	0.50225
Q9Y678_COPG1	13.22	0.05	1	-	0	0.50225
P51826_AFF3	13.21	0.05	1	PF05110	2	0.50225
Q8WYQ9_ZCCHC14	13.21	0.05	1	PF00098	1	0.50225
Q9HAV4_XPO5	13.21	0.05	1	PF08389	1	0.50225
P35998_PSMC2	13.2	0.05	1	-	0	0.502208
Q9Y3A2_UTP11	13.2	0.05	1	PF03998	1	0.502208
Q8IYY4_DZIP1L	13.19	0.05	1	-	0	0.502167
P13667_PDIA4	13.16	0.05	1	-	0	0.502125
P78527_PRKDC	13.14	0.05	1	-	0	0.502042
Q99590_SCAF11	13.14	0.05	1	PF13639	1	0.502042
Q8IYB8_SUPV3L1	13.13	0.05	1	PF12513,PF00271	2	0.502042
Q9UPN6_SCAF8	13.11	0.05	1	PF00076	1	0.501958
P18031_PTPN1	13.1	0.05	1	-	0	0.501958
P19388_POLR2E	13.1	0.05	1	PF01191,PF03871	2	0.501958
P59045_NLRP11	13.1	0.05	1	-	0	0.501958
Q5T8I9_HENMT1	13.1	0.05	1	-	0	0.501958
Q86TB9_PATL1	13.09	0.05	1	PF09770	1	0.501917
Q5HYM0_ZC3H12B	13.08	0.05	1	PF11977	1	0.501917
Q8N8A6_DDX51	13.08	0.05	1	PF00270,PF00271,PF04851	3	0.501917
Q9NNW5_WDR6	13.08	0.05	1	PF00400	1	0.501917
O60763_USO1	13.07	0.04	1	-	0	0.501875
P18583_SON	13.07	0.04	1	PF01585,PF14709,PF12656	3	0.501875
P61129_ZC3H6	13.07	0.04	1	PF00642,PF14608	3	0.501875
Q9H583_HEATR1	13.06	0.04	1	PF12397	1	0.501833
Q96SB4_SRPK1	13.05	0.04	1	-	0	0.501833
Q96C57_CUSTOS	13.04	0.04	1	-	0	0.501792
Q16629_SRSF7	13.03	0.04	1	PF00076	1	0.501792
P46109_CRKL	13.02	0.04	1	-	0	0.50175
P02786_TFRC	13	0.04	1	-	0	0.501708
P22626_HNRNPA2B1	13	0.04	1	PF00076	2	0.501708
Q01085_TIAL1	13	0.04	1	PF00076	3	0.501708
Q9UPR3_SMG5	13	0.04	1	PF10373,PF10374,PF13638	4	0.501708
O94829_IPO13	12.99	0.04	1	PF08389,PF03810	2	0.501667
Q12931_TRAP1	12.98	0.04	1	-	0	0.501625
Q9H9Z2_LIN28A	12.94	0.04	1	-	0	0.501542
Q9P2E3_ZNFX1	12.93	0.04	1	PF13087,PF13086,PF13245	3	0.5015
Q9H3Q1_CDC42EP4	12.92	0.04	1	-	0	0.5015
Q9NR56_MBNL1	12.91	0.04	1	PF00642	1	0.501458
P24928_POLR2A	12.9	0.03	1	PF04997,PF04998,PF00623,PF04992,PF04990,PF04983,PF05000	7	0.501417
Q15024_EXOSC7	12.9	0.03	1	PF01138,PF03725	2	0.501417
O75494_SRSF10	12.89	0.03	1	PF00076	1	0.668083
Q9H2T7_RANBP17	12.89	0.03	1	PF03810	1	0.501417
Q96EU6_RRP36	12.87	0.03	1	PF06102	1	0.501375
P42166_TMPO	12.86	0.03	1	-	0	0.501333
P30414_NKTR	12.85	0.03	1	PF00160	1	0.501292
Q8IVH4_MMAA	12.84	0.03	1	-	0	0.501292
Q8TC59_PIWIL2	12.84	0.03	1	PF02171,PF02170	2	0.501292
Q9Y4B5_MTCL1	12.83	0.03	1	-	0	0.50125
O75127_PTCD1	12.82	0.03	1	PF01535	1	0.501208
Q7Z2Z2_EFL1	12.82	0.03	1	PF00009,PF00679	2	0.501208
Q8IV42_PSTK	12.82	0.03	1	PF13671	1	0.501208
P08579_SNRPB2	12.81	0.03	1	-	0	0.501208
P54886_ALDH18A1	12.8	0.03	1	-	0	0.501167
Q14684_RRP1B	12.79	0.03	1	PF05997	1	0.501167
Q8TE96_DQX1	12.79	0.03	1	PF04408	1	0.501167
Q9NR97_TLR8	12.79	0.03	1	-	0	0.501167
O43592_XPOT	12.78	0.03	1	PF08389,PF03810	2	0.501125
Q7Z2W4_ZC3HAV1	12.78	0.03	1	PF00644	1	0.501125
Q6Y7W6_GIGYF2	12.77	0.03	1	-	0	0.501083
Q9NVV4_MTPAP	12.77	0.03	1	PF03828	1	0.501083
P82930_MRPS34	12.72	0.02	1	-	0	0.500958
P84090_ERH	12.72	0.02	1	-	0	0.500958
Q99798_ACO2	12.71	0.02	1	PF00330,PF00694	2	0.500958
Q9UJA5_TRMT6	12.71	0.02	1	PF04189	1	0.500958
Q14764_MVP	12.7	0.02	1	PF01505	4	0.500917
Q5PRF9_SAMD4B	12.69	0.02	1	-	0	0.500875
Q5TAP6_UTP14C	12.69	0.02	1	PF04615	1	0.500875
Q9BTL3_RAMAC	12.69	0.02	1	PF15320	1	0.500875
Q96PU8_QKI	12.68	0.02	1	PF00013	1	0.500875
Q96SI9_STRBP	12.68	0.02	1	PF07528,PF00035	3	0.500875
Q86VM9_ZC3H18	12.67	0.02	1	-	0	0.500833
Q9Y262_EIF3L	12.67	0.02	1	PF10255	1	0.500833
O14893_GEMIN2	12.66	0.02	1	PF04938	1	0.500792
P09211_GSTP1	12.66	0.02	1	-	0	0.500792
O75179_ANKRD17	12.65	0.02	1	PF00013	1	0.500792
Q9H0A0_NAT10	12.65	0.02	1	PF13725,PF05127	2	0.500792
P13798_APEH	12.62	0.02	1	-	0	0.500708
Q9UHC7_MKRN1	12.61	0.02	1	PF00642,PF14608,PF00097	5	0.500667
Q9BXR0_QTRT1	12.59	0.02	1	PF01702	1	0.500625
Q9C0B9_ZCCHC2	12.59	0.02	1	PF00098	1	0.500625
Q9NWH9_SLTM	12.59	0.02	1	PF00076,PF02037,PF13893	3	0.500625
P49790_NUP153	12.58	0.02	1	PF00641	4	0.500625
Q12788_TBL3	12.58	0.02	1	PF00400,PF08625	6	0.500625
Q9H9A5_CNOT10	12.58	0.02	1	-	0	0.500625
P07355_ANXA2	12.57	0.01	1	-	0	0.500583
Q9H3H3_C11orf68	12.57	0.01	1	PF08939	1	0.500583
Q9UIA9_XPO7	12.57	0.01	1	PF03810	1	0.500583
Q9BVI4_NOC4L	12.56	0.01	1	PF03914	1	0.500542
Q9HCG8_CWC22	12.56	0.01	1	PF02847	1	0.500542
Q9NWX6_THG1L	12.56	0.01	1	PF04446	1	0.500542
O95786_DDX58	12.55	0.01	1	-	0	0.500542
P10153_RNASE2	12.55	0.01	1	PF00074	1	0.500542
Q9NYY8_FASTKD2	12.55	0.01	1	PF06743,PF08373,PF08368	3	0.500542
O75460_ERN1	12.54	0.01	1	PF06479	1	0.5005
Q5JSZ5_PRRC2B	12.54	0.01	1	-	0	0.5005
P52597_HNRNPF	12.53	0.01	1	PF00076,PF08080	3	0.500458
Q8TEQ6_GEMIN5	12.51	0.01	1	PF00400	1	0.500417
O60231_DHX16	12.5	0.01	1	PF04408,PF00271,PF00270	3	0.500417
P61247_RPS3A	12.5	0.01	1	PF01015	1	0.500417
Q99714_HSD17B10	12.5	0.01	1	-	0	0.500417
Q9UGR2_ZC3H7B	12.5	0.01	1	PF00642	2	0.500417
O15400_STX7	12.49	0.01	1	-	0	0.500375
Q86XP3_DDX42	12.49	0.01	1	PF00270,PF00271,PF04851	3	0.500375
O95926_SYF2	12.48	0.01	1	PF08231	1	0.500333
P21333_FLNA	12.47	0.01	1	-	0	0.500333
Q96RS0_TGS1	12.47	0.01	1	PF09445,PF02475,PF01170	3	0.500333
Q9P0J6_MRPL36	12.46	0.01	1	PF00444	1	0.500292
P26640_VARS1	12.45	0.01	1	PF00133,PF08264,PF09334	3	0.50025
P26447_S100A4	12.44	0.01	1	-	0	0.50025
P42677_RPS27	12.44	0.01	1	PF01667	1	0.50025
Q99613_EIF3C	12.44	0.01	1	PF05470	1	0.50025
P46777_RPL5	12.43	0	1	-	0	0.500208
Q8WXA9_SREK1	12.43	0	1	PF00076	1	0.500208
B5ME19_EIF3CL	12.42	0	1	PF05470	1	0.500208
Q16666_IFI16	12.42	0	1	-	0	0.500208
Q96P70_IPO9	12.42	0	1	PF03810	1	0.500208
Q96T21_SECISBP2	12.42	0	1	PF01248	1	0.500208
Q9HCM7_FBRSL1	12.42	0	1	-	0	0.500208
P14868_DARS1	12.41	0	1	PF00152,PF01336	2	0.500167
Q15393_SF3B3	12.41	0	1	PF03178	1	0.500167
Q15020_SART3	12.4	0	1	PF00076,PF05391	3	0.500125
Q71RC2_LARP4	12.4	0	1	PF05383	1	0.500125
Q9NX05_FAM120C	12.4	0	1	-	0	0.500125
P62308_SNRPG	12.39	0	1	PF01423	1	0.500125
Q12955_ANK3	12.38	0	1	-	0	0.500083
P46821_MAP1B	12.37	0	1	-	0	0.500042
P29375_KDM5A	12.36	0	1	-	0	0.500042
P36873_PPP1CC	12.36	0	1	-	0	0.500042
Q92576_PHF3	12.35	0	1	PF07744	1	0.5
Q8IWA0_WDR75	12.34	0	1	PF00400	2	0.5
Q8NAV1_PRPF38A	12.34	0	1	PF03371	1	0.5
Q9UII4_HERC5	12.33	0	1	-	0	0.499958
Q9Y2K5_R3HDM2	12.33	0	1	PF01424	1	0.499958
A6NFN3_RBFOX3	12.32	0	1	-	0	0.499917
P00734_F2	12.32	0	1	-	0	0.499917
P56192_MARS1	12.32	0	1	PF09334	1	0.499917
Q2TBE0_CWF19L2	12.32	0	1	PF04677,PF04676	2	0.499917
Q6NZY4_ZCCHC8	12.32	0	1	PF00098	1	0.499917
Q7Z7A3_CTU1	12.31	0	1	-	0	0.499917
P07814_EPRS1	12.3	0	1	PF00749,PF03950,PF09180,PF00587,PF03129	5	0.499875
Q96EK7_FAM120B	12.3	0	1	-	0	0.499875
O14828_SCAMP3	12.29	0	1	-	0	0.499833
P12724_RNASE3	12.29	0	1	PF00074	1	0.499833
Q8IVS2_MCAT	12.29	0	1	-	0	0.499833
Q9NYF8_BCLAF1	12.29	0	1	PF15440	1	0.499833
O43809_NUDT21	12.27	0	1	PF13869	1	0.499792
O15455_TLR3	12.26	0	1	-	0	0.499792
P38935_IGHMBP2	12.25	-0.01	1	-	0	0.833083
Q15031_LARS2	12.23	-0.01	1	PF00133,PF09334,PF08264	6	0.499708
A7MD48_SRRM4	12.21	-0.01	1	-	0	0.499667
O60828_PQBP1	12.2	-0.01	1	-	0	0.499625
Q8NDG6_TDRD9	12.2	-0.01	1	PF00567,PF00271,PF04408,PF00270	4	0.499625
P40227_CCT6A	12.19	-0.01	1	-	0	0.499583
P46087_NOP2	12.19	-0.01	1	PF01189	1	0.499583
Q14789_GOLGB1	12.19	-0.01	1	-	0	0.499583
Q5C9Z4_NOM1	12.18	-0.01	1	PF02847,PF02854	2	0.499583
Q9UK61_TASOR	12.18	-0.01	1	-	0	0.499583
O94979_SEC31A	12.16	-0.01	1	-	0	0.4995
P50395_GDI2	12.16	-0.01	1	-	0	0.4995
Q6P6C2_ALKBH5	12.16	-0.01	1	PF13532	1	0.4995
Q8IWR0_ZC3H7A	12.16	-0.01	1	PF00642	1	0.4995
P60153_RNASE9	12.15	-0.01	1	PF00074	1	0.4995
Q9UKK3_PARP4	12.15	-0.01	1	PF00644	1	0.4995
Q9H1E1_RNASE7	12.14	-0.01	1	PF00074	1	0.499458
Q9UPU9_SAMD4A	12.14	-0.01	1	-	0	0.499458
Q14847_LASP1	12.13	-0.01	1	-	0	0.499458
Q96C86_DCPS	12.13	-0.01	1	PF11969,PF05652	2	0.499458
Q9Y421_FAM32A	12.13	-0.01	1	-	0	0.499458
Q6UN15_FIP1L1	12.12	-0.01	1	PF05182	1	0.499417
P07900_HSP90AA1	12.09	-0.02	1	-	0	0.499333
P35579_MYH9	12.09	-0.02	1	-	0	0.499333
P82909_MRPS36	12.09	-0.02	1	-	0	0.499333
P02511_CRYAB	12.07	-0.02	1	-	0	0.499292
P17480_UBTF	12.07	-0.02	1	-	0	0.499292
Q96PK6_RBM14	12.07	-0.02	1	PF00076	2	0.499292
Q9NQ29_LUC7L	12.07	-0.02	1	PF03194	1	0.499292
P15880_RPS2	12.05	-0.02	1	PF00333,PF03719	2	0.49925
P31153_MAT2A	12.04	-0.02	1	-	0	0.499208
Q9H7B2_RPF2	12.04	-0.02	1	PF04427	1	0.499208
Q8NE35_CPEB3	12.03	-0.02	1	PF00076	1	0.499167
Q9Y314_NOSIP	12.03	-0.02	1	-	0	0.499167
Q5T200_ZC3H13	12.01	-0.02	1	PF00642	1	0.499125
Q9NVP1_DDX18	12.01	-0.02	1	PF00270,PF00271,PF13959	3	0.499125
Q7Z3E1_TIPARP	11.99	-0.02	1	PF00644	1	0.499083
P11498_PC	11.98	-0.02	1	-	0	0.499042
P49750_YLPM1	11.98	-0.02	1	PF13671	1	0.499042
Q00341_HDLBP	11.98	-0.02	1	PF00013	14	0.499042
Q14694_USP10	11.98	-0.02	1	PF07145	1	0.499042
P16615_ATP2A2	11.97	-0.02	1	-	0	0.499042
Q9BTC0_DIDO1	11.96	-0.02	1	PF07744	1	0.499
P48357_LEPR	11.95	-0.02	1	-	0	0.498958
Q14978_NOLC1	11.95	-0.02	1	PF05022	1	0.498958
Q96DV4_MRPL38	11.95	-0.02	1	-	0	0.498958
Q9H0H0_INTS2	11.95	-0.02	1	PF14750	1	0.498958
Q9NUL5_SHFL	11.93	-0.03	1	-	0	0.498917
O75818_RPP40	11.92	-0.03	1	PF08584	1	0.498875
A5YKK6_CNOT1	11.91	-0.03	1	PF04054	1	0.498875
Q96EF6_FBXO17	11.91	-0.03	1	-	0	0.498875
Q9P2N5_RBM27	11.91	-0.03	1	PF01480,PF00076,PF00642	3	0.498875
Q53R41_FASTKD1	11.9	-0.03	1	PF08368,PF06743,PF08373	3	0.498833
P09661_SNRPA1	11.89	-0.03	1	-	0	0.498833
Q7L8L6_FASTKD5	11.89	-0.03	1	PF08368,PF06743,PF08373	3	0.498833
Q9UNY4_TTF2	11.88	-0.03	1	PF00176,PF00271,PF04851	3	0.498792
P23193_TCEA1	11.87	-0.03	1	-	0	0.49875
Q8NCM8_DYNC2H1	11.87	-0.03	1	-	0	0.49875
Q08170_SRSF4	11.86	-0.03	1	PF00076	2	0.832083
Q14697_GANAB	11.86	-0.03	1	-	0	0.49875
Q9UBK2_PPARGC1A	11.86	-0.03	1	PF00076	1	0.49875
Q9Y4C8_RBM19	11.86	-0.03	1	PF00076	6	0.49875
P09012_SNRPA	11.85	-0.03	1	PF00076	2	0.665375
Q15032_R3HDM1	11.85	-0.03	1	PF12752,PF01424	2	0.498708
Q9HBL0_TNS1	11.85	-0.03	1	-	0	0.498708
P62875_POLR2L	11.84	-0.03	1	PF01194	1	0.498708
Q9UJV8_PURG	11.82	-0.03	1	PF04845	1	0.498625
Q14974_KPNB1	11.81	-0.03	1	PF03810	1	0.498625
Q7Z6M4_MTERF4	11.81	-0.03	1	PF02536	1	0.498625
Q8N302_AGGF1	11.8	-0.03	1	-	0	0.498583
Q9BXP5_SRRT	11.8	-0.03	1	PF04959	1	0.498583
Q9UKD2_MRTO4	11.8	-0.03	1	PF00466	1	0.498583
P78344_EIF4G2	11.79	-0.04	1	PF02854,PF02020,PF02847	3	0.498542
P54136_RARS1	11.78	-0.04	1	PF00750,PF05746,PF03485	3	0.498542
Q13310_PABPC4	11.78	-0.04	1	PF00076,PF00658	5	0.498542
P12270_TPR	11.77	-0.04	1	-	0	0.4985
P56537_EIF6	11.77	-0.04	1	-	0	0.4985
Q12986_NFX1	11.77	-0.04	1	PF01424	1	0.4985
Q13823_GNL2	11.77	-0.04	1	PF01926	1	0.4985
Q13442_PDAP1	11.76	-0.04	1	-	0	0.4985
P16401_H1-5	11.75	-0.04	1	-	0	0.498458
Q69YN2_CWF19L1	11.75	-0.04	1	PF04677,PF04676	2	0.498458
O15042_U2SURP	11.74	-0.04	1	PF01805,PF00076,PF08312	3	0.498417
O94906_PRPF6	11.73	-0.04	1	PF06424	1	0.498417
Q9BZJ0_CRNKL1	11.73	-0.04	1	PF02184,PF05843	3	0.498417
Q9NX58_LYAR	11.73	-0.04	1	-	0	0.498417
Q9C0J8_WDR33	11.72	-0.04	1	PF00400	1	0.498375
Q9Y4F3_MARF1	11.71	-0.04	1	-	0	0.498333
Q9UPS6_SETD1B	11.7	-0.04	1	PF00076	1	0.498333
Q86YN6_PPARGC1B	11.69	-0.04	1	PF00076	1	0.498292
Q9ULR0_ISY1	11.69	-0.04	1	PF06246	1	0.498292
Q15056_EIF4H	11.67	-0.04	1	PF00076	1	0.49825
P61927_RPL37	11.66	-0.04	1	PF01907	1	0.498208
Q15102_PAFAH1B3	11.66	-0.04	1	-	0	0.498208
Q6P2Q9_PRPF8	11.66	-0.04	1	PF08083,PF12134,PF10596,PF08082,PF10597,PF08084,PF10598,PF01398	8	0.498208
Q9Y388_RBMX2	11.65	-0.04	1	PF00076	1	0.498208
Q9H0D6_XRN2	11.64	-0.04	1	PF03159	1	0.498167
Q9H8H0_NOL11	11.64	-0.04	1	PF08168	1	0.498167
Q9BRZ2_TRIM56	11.63	-0.04	1	PF00097,PF13923	2	0.498125
P50502_ST13	11.62	-0.04	1	-	0	0.498125
P51003_PAPOLA	11.62	-0.04	1	PF04926	1	0.498125
P08238_HSP90AB1	11.61	-0.05	1	-	0	0.498083
Q96EL3_MRPL53	11.61	-0.05	1	PF10780	1	0.498083
Q9BZC1_CELF4	11.56	-0.05	1	-	0	0.497958
P19338_NCL	11.55	-0.05	1	PF00076	4	0.497917
Q8IYB3_SRRM1	11.54	-0.05	1	PF01480	1	0.497917
Q9UGU0_TCF20	11.54	-0.05	1	-	0	0.497917
Q9UL18_AGO1	11.53	-0.05	1	PF02171,PF02170	2	0.497875
Q5VZF2_MBNL2	11.52	-0.05	1	PF00642	2	0.664542
P17987_TCP1	11.52	-0.05	1	-	0	0.497875
Q8WWH5_TRUB1	11.52	-0.05	1	PF01509	1	0.497875
Q6PJT7_ZC3H14	11.51	-0.05	1	PF14608	2	0.497833
Q9H9J4_USP42	11.51	-0.05	1	-	0	0.497833
P30101_PDIA3	11.5	-0.05	1	-	0	0.497792
Q9Y223_GNE	11.5	-0.05	1	-	0	0.497792
P62826_RAN	11.49	-0.05	1	PF08477	1	0.497792
Q8NC60_NOA1	11.49	-0.05	1	PF01926	1	0.497792
P49327_FASN	11.47	-0.06	1	-	0	0.497708
P05141_SLC25A5	11.46	-0.06	1	-	0	0.497708
Q9BU23_LMF2	11.46	-0.06	1	-	0	0.497708
Q8TDD1_DDX54	11.45	-0.06	1	PF00270,PF00271,PF08147,PF04851	4	0.497667
Q9ULX3_NOB1	11.45	-0.06	1	PF08772	1	0.497667
P42285_MTREX	11.44	-0.06	1	PF13234,PF00270,PF00271	3	0.497667
P61956_SUMO2	11.44	-0.06	1	-	0	0.497667
Q14157_UBAP2L	11.44	-0.06	1	-	0	0.497667
Q9H0R6_QRSL1	11.44	-0.06	1	-	0	0.497667
Q9H9G7_AGO3	11.44	-0.06	1	PF02171,PF02170	2	0.497667
Q9NQT4_EXOSC5	11.44	-0.06	1	PF01138,PF03725	2	0.497667
Q9NR50_EIF2B3	11.43	-0.06	1	-	0	0.497625
Q702N8_XIRP1	11.42	-0.06	1	-	0	0.497583
Q8N8Q3_ENDOV	11.41	-0.06	1	PF04493	1	0.497583
Q8NBP7_PCSK9	11.37	-0.06	1	-	0	0.497458
Q9NYK1_TLR7	11.36	-0.06	1	-	0	0.497458
Q9Y490_TLN1	11.36	-0.06	1	-	0	0.497458
P51991_HNRNPA3	11.35	-0.06	1	PF00076	2	0.664083
P26373_RPL13	11.35	-0.06	1	PF01294	1	0.497417
Q96BT7_ALKBH8	11.34	-0.06	1	PF13532,PF13847,PF05148	3	0.497375
O94913_PCF11	11.33	-0.06	1	-	0	0.497375
P09874_PARP1	11.33	-0.06	1	PF00644,PF05406	2	0.497375
Q76FK4_NOL8	11.32	-0.06	1	PF00076	1	0.497333
Q93091_RNASE6	11.32	-0.06	1	PF00074	1	0.497333
Q8N9T8_KRI1	11.31	-0.06	1	-	0	0.497333
Q99973_TEP1	11.31	-0.06	1	PF05731,PF00400	2	0.497333
Q13523_PRPF4B	11.29	-0.07	1	-	0	0.49725
Q9H0W8_SMG9	11.29	-0.07	1	-	0	0.49725
Q15233_NONO	11.27	-0.07	1	PF00076,PF08075	3	0.497208
Q5UIP0_RIF1	11.27	-0.07	1	PF12231	1	0.497208
Q9GZR7_DDX24	11.27	-0.07	1	PF00270,PF00271	2	0.497208
Q9NRW3_APOBEC3C	11.27	-0.07	1	PF08210,PF05240	2	0.497208
P07998_RNASE1	11.26	-0.07	1	PF00074	1	0.497167
Q09161_NCBP1	11.26	-0.07	1	PF09090,PF09088,PF02854	3	0.497167
Q9UQ84_EXO1	11.25	-0.07	1	-	0	0.497167
Q14683_SMC1A	11.24	-0.07	1	-	0	0.497125
Q5T8P6_RBM26	11.24	-0.07	1	PF01480	1	0.497125
Q9H5Z1_DHX35	11.22	-0.07	1	PF04408,PF00271	2	0.497083
P63165_SUMO1	11.21	-0.07	1	-	0	0.497042
Q8IWZ3_ANKHD1	11.21	-0.07	1	PF00013	1	0.497042
O43707_ACTN4	11.2	-0.07	1	-	0	0.497042
Q9ULW3_ABT1	11.2	-0.07	1	-	0	0.497042
P10636_MAPT	11.19	-0.07	1	-	0	0.497
P29084_GTF2E2	11.19	-0.07	1	-	0	0.497
P82650_MRPS22	11.19	-0.07	1	PF10245	1	0.497
Q5T6F2_UBAP2	11.19	-0.07	1	-	0	0.497
P49770_EIF2B2	11.18	-0.07	1	PF01008	1	0.496958
Q9BZE4_GTPBP4	11.18	-0.07	1	PF06858,PF08155,PF01926	3	0.496958
Q9P2I0_CPSF2	11.18	-0.07	1	PF10996,PF07521,PF00753	3	0.496958
Q9UKJ3_GPATCH8	11.18	-0.07	1	PF01585,PF12171	2	0.496958
O15381_NVL	11.17	-0.07	1	-	0	0.496958
Q9Y291_MRPS33	11.17	-0.07	1	PF08293	1	0.496958
Q92688_ANP32B	11.15	-0.07	1	-	0	0.496917
Q5QJE6_DNTTIP2	11.14	-0.08	1	PF08698	1	0.496875
Q8IY81_FTSJ3	11.13	-0.08	1	PF01728	1	0.496833
Q9P013_CWC15	11.13	-0.08	1	PF04889	1	0.496833
Q9H0Z9_RBM38	11.12	-0.08	1	PF00076	1	0.496833
Q8NI36_WDR36	11.11	-0.08	1	PF04192,PF00400	2	0.496792
Q96A33_CCDC47	11.1	-0.08	1	-	0	0.49675
Q5TAX3_TUT4	11.09	-0.08	1	PF03828,PF00098	3	0.49675
O00410_IPO5	11.08	-0.08	1	-	0	0.496708
P51816_AFF2	11.08	-0.08	1	PF05110	1	0.496708
Q14249_ENDOG	11.08	-0.08	1	PF01223	1	0.496708
Q6NSI4_RADX	11.06	-0.08	1	-	0	0.496667
Q9NVH2_INTS7	11.04	-0.08	1	-	0	0.496625
P49761_CLK3	11.03	-0.08	1	-	0	0.496583
Q9C0D7_ZC3H12C	11.03	-0.08	1	PF11977	1	0.496583
P02751_FN1	11.02	-0.08	1	-	0	0.496583
Q9BRR8_GPATCH1	11.02	-0.08	1	PF07713,PF01585	2	0.496583
Q8NDV7_TNRC6A	11.01	-0.08	1	PF10427	1	0.496542
Q8TA86_RP9	11	-0.08	1	-	0	0.4965
Q9NQC3_RTN4	11	-0.08	1	-	0	0.4965
P02545_LMNA	10.99	-0.08	1	-	0	0.4965
Q8N7X1_RBMXL3	10.99	-0.08	1	PF00076	1	0.4965
Q12874_SF3A3	10.98	-0.08	1	PF11931,PF13297,PF12108	3	0.496458
Q58A45_PAN3	10.97	-0.09	1	-	0	0.496417
Q7Z5L2_R3HCC1L	10.97	-0.09	1	-	0	0.496417
Q9BQG0_MYBBP1A	10.95	-0.09	1	-	0	0.496375
Q8N5N7_MRPL50	10.94	-0.09	1	PF10501	1	0.496375
Q9UKV8_AGO2	10.93	-0.09	1	PF02171,PF02170	2	0.829667
Q12873_CHD3	10.93	-0.09	1	PF00176,PF00271,PF04851	3	0.496333
Q96CT7_CCDC124	10.93	-0.09	1	-	0	0.496333
Q9NP64_ZCCHC17	10.92	-0.09	1	PF00575	1	0.496292
P61604_HSPE1	10.91	-0.09	1	-	0	0.496292
Q8WUQ7_CACTIN	10.91	-0.09	1	-	0	0.496292
Q13148_TARDBP	10.9	-0.09	1	PF00076	2	0.49625
P49368_CCT3	10.89	-0.09	1	-	0	0.496208
Q8NBJ9_SIDT2	10.88	-0.09	1	PF13965	1	0.496208
Q9UNZ2_NSFL1C	10.86	-0.09	1	-	0	0.496167
Q8IZH2_XRN1	10.85	-0.09	1	PF03159	1	0.496125
Q9BX40_LSM14B	10.84	-0.09	1	PF12701,PF09532,PF14438	3	0.496083
Q9Y2X3_NOP58	10.84	-0.09	1	PF01798,PF08156	2	0.496083
Q8N442_GUF1	10.83	-0.09	1	PF00009,PF00679,PF03144,PF01926	4	0.496083
Q5VT52_RPRD2	10.82	-0.1	1	-	0	0.496042
O95453_PARN	10.81	-0.1	1	PF04857,PF08675	2	0.496
P17844_DDX5	10.81	-0.1	1	PF00270,PF00271,PF08061	4	0.496
Q8TDE3_RNASE8	10.81	-0.1	1	PF00074	1	0.496
Q9NP73_ALG13	10.81	-0.1	1	-	0	0.496
Q99633_PRPF18	10.79	-0.1	1	PF02840,PF08799	2	0.495958
Q9UBC3_DNMT3B	10.79	-0.1	1	-	0	0.495958
Q9HCK5_AGO4	10.78	-0.1	1	PF02171,PF02170	2	0.495958
Q00059_TFAM	10.75	-0.1	1	-	0	0.495875
Q9H6E5_TUT1	10.75	-0.1	1	-	0	0.495875
Q8IYT2_CMTR2	10.74	-0.1	1	PF01728	1	0.495833
Q9H0K6_PUS7L	10.74	-0.1	1	PF01142	1	0.495833
Q15269_PWP2	10.73	-0.1	1	PF00400,PF04003	3	0.495792
Q9BWT3_PAPOLG	10.73	-0.1	1	PF04926	2	0.495792
Q9NZ01_TECR	10.71	-0.1	1	-	0	0.49575
O15226_NKRF	10.7	-0.1	1	PF01585,PF01424,PF12656	3	0.49575
Q96RP9_GFM1	10.7	-0.1	1	PF00009,PF03764,PF00679,PF03144	4	0.49575
A9UHW6_MIF4GD	10.69	-0.1	1	PF02854	1	0.495708
Q5GAN3_RNASE13	10.69	-0.1	1	PF00074	1	0.495708
Q9UIF9_BAZ2A	10.69	-0.1	1	PF01429	1	0.495708
Q9UL03_INTS6	10.69	-0.1	1	PF15300	1	0.495708
P00505_GOT2	10.68	-0.1	1	-	0	0.495667
Q14667_KIAA0100	10.66	-0.1	1	-	0	0.495625
Q99439_CNN2	10.65	-0.1	1	-	0	0.495625
Q587J7_TDRD12	10.64	-0.11	1	PF00567,PF00270	3	0.495583
Q13573_SNW1	10.63	-0.11	1	-	0	0.495542
Q9NRX1_PNO1	10.62	-0.11	1	-	0	0.495542
P23246_SFPQ	10.61	-0.11	1	PF00076,PF08075	3	0.662167
P62805_H4C1	10.61	-0.11	1	-	0	0.4955
Q14527_HLTF	10.61	-0.11	1	PF00176,PF08797,PF00271,PF13923,PF00097	5	0.4955
Q9P2K8_EIF2AK4	10.61	-0.11	1	PF12745,PF13393	2	0.4955
Q92615_LARP4B	10.6	-0.11	1	PF05383	1	0.495458
Q96FX7_TRMT61A	10.6	-0.11	1	PF08704	1	0.495458
Q4G0J3_LARP7	10.59	-0.11	1	PF08777,PF05383,PF00076	3	0.495458
Q68CQ4_DIEXF	10.59	-0.11	1	-	0	0.495458
Q16630_CPSF6	10.57	-0.11	1	PF00076	1	0.495417
Q6P1L8_MRPL14	10.57	-0.11	1	PF00238	1	0.495417
P47897_QARS1	10.56	-0.11	1	PF00749,PF04558,PF03950,PF04557	4	0.495375
Q9Y4I1_MYO5A	10.55	-0.11	1	-	0	0.495333
P41250_GARS1	10.54	-0.11	1	PF03129,PF00587	2	0.495333
P49755_TMED10	10.53	-0.11	1	-	0	0.495292
P52756_RBM5	10.52	-0.11	1	PF01585,PF00076,PF00641,PF12656	4	0.661917
Q99728_BARD1	10.52	-0.11	1	-	0	0.49525
Q99442_SEC62	10.51	-0.11	1	-	0	0.49525
Q9BQ52_ELAC2	10.51	-0.11	1	PF13691	1	0.49525
P46013_MKI67	10.5	-0.12	1	PF00498	1	0.495208
Q2Q1W2_TRIM71	10.5	-0.12	1	-	0	0.495208
Q8N201_INTS1	10.5	-0.12	1	-	0	0.495208
Q969H6_POP5	10.5	-0.12	1	PF01900	1	0.495208
P11388_TOP2A	10.48	-0.12	1	PF01751	1	0.495167
Q02878_RPL6	10.48	-0.12	1	PF01159,PF03868	2	0.495167
Q09666_AHNAK	10.47	-0.12	1	-	0	0.495125
Q13825_AUH	10.47	-0.12	1	-	0	0.495125
Q5VV67_PPRC1	10.47	-0.12	1	PF00076	1	0.495125
P35637_FUS	10.44	-0.12	1	PF00641,PF00076	2	0.828375
Q53EP0_FNDC3B	10.43	-0.12	1	-	0	0.495042
Q7KZI7_MARK2	10.43	-0.12	1	-	0	0.495042
Q92540_SMG7	10.43	-0.12	1	PF10373,PF10374	2	0.495042
A8K979_ERI2	10.42	-0.12	1	PF00929	1	0.495
Q13395_TARBP1	10.42	-0.12	1	PF00588	1	0.495
Q14204_DYNC1H1	10.42	-0.12	1	-	0	0.495
Q14671_PUM1	10.41	-0.12	1	PF00806	8	0.495
P38398_BRCA1	10.4	-0.12	1	PF00097,PF13923	2	0.494958
Q07954_LRP1	10.4	-0.12	1	-	0	0.494958
Q17RY0_CPEB4	10.39	-0.12	1	PF00076	1	0.494917
P49406_MRPL19	10.35	-0.12	1	PF01245	1	0.494833
Q9P031_CCDC59	10.35	-0.12	1	PF08524	1	0.494833
O95149_SNUPN	10.34	-0.12	1	PF11538	1	0.494792
Q10570_CPSF1	10.34	-0.12	1	PF03178	1	0.494792
Q6IPR3_TYW3	10.34	-0.12	1	PF02676	1	0.494792
O00267_SUPT5H	10.33	-0.12	1	PF00467	1	0.494792
P78371_CCT2	10.33	-0.12	1	-	0	0.494792
Q5JTH9_RRP12	10.33	-0.12	1	PF08161	1	0.494792
P48735_IDH2	10.32	-0.13	1	-	0	0.49475
P98179_RBM3	10.32	-0.13	1	PF00076	1	0.49475
Q32P51_HNRNPA1L2	10.32	-0.13	1	PF00076,PF11627	3	0.49475
O60518_RANBP6	10.31	-0.13	1	-	0	0.494708
Q7Z6V5_ADAT2	10.31	-0.13	1	-	0	0.494708
P49207_RPL34	10.3	-0.13	1	PF01199	1	0.494708
Q8IYB7_DIS3L2	10.3	-0.13	1	PF00773	1	0.494708
P51608_MECP2	10.25	-0.13	1	PF01429	1	0.494583
Q9ULX6_AKAP8L	10.22	-0.13	1	PF04988	1	0.4945
Q9Y2H6_FNDC3A	10.21	-0.13	1	-	0	0.494458
P26358_DNMT1	10.2	-0.13	1	-	0	0.494458
Q8TC92_ENOX1	10.2	-0.13	1	-	0	0.494458
Q76MJ5_ERN2	10.19	-0.13	1	PF06479	1	0.494417
Q7RTV0_PHF5A	10.19	-0.13	1	PF03660	1	0.494417
Q5XG87_TENT4A	10.16	-0.14	1	PF03828	1	0.494333
Q75QN2_INTS8	10.16	-0.14	1	-	0	0.494333
O75691_UTP20	10.15	-0.14	1	PF07539	1	0.494292
P23588_EIF4B	10.15	-0.14	1	PF00076	1	0.494292
Q08945_SSRP1	10.15	-0.14	1	-	0	0.494292
P11940_PABPC1	10.14	-0.14	1	PF00076,PF00658	5	0.827625
P05198_EIF2S1	10.14	-0.14	1	PF07541,PF00575	2	0.494292
P55884_EIF3B	10.14	-0.14	1	PF08662,PF00076	2	0.494292
O00411_POLRMT	10.13	-0.14	1	PF00940	1	0.49425
P35555_FBN1	10.13	-0.14	1	-	0	0.49425
P54105_CLNS1A	10.13	-0.14	1	-	0	0.49425
C9JE40_PATL2	10.12	-0.14	1	PF09770	1	0.49425
Q68E01_INTS3	10.12	-0.14	1	PF10189	1	0.49425
Q6P2E9_EDC4	10.1	-0.14	1	-	0	0.494167
O75533_SF3B1	10.09	-0.14	1	PF08920	1	0.494167
P14866_HNRNPL	10.08	-0.14	1	PF13893,PF00076	4	0.494125
O60573_EIF4E2	10.07	-0.14	1	PF01652	1	0.494083
P16070_CD44	10.07	-0.14	1	-	0	0.494083
Q9Y3X0_CCDC9	10.07	-0.14	1	-	0	0.494083
A2RTX5_TARS3	10.06	-0.14	1	PF00587,PF03129,PF07973	3	0.494083
P55265_ADAR	10.06	-0.14	1	PF02137,PF02295,PF00035	6	0.494083
Q8N5Y2_MSL3	10.06	-0.14	1	PF11717	1	0.494083
Q8WXF0_SRSF12	10.06	-0.14	1	PF00076	1	0.494083
Q9UNQ2_DIMT1	10.06	-0.14	1	PF00398	1	0.494083
P25440_BRD2	10.05	-0.14	1	-	0	0.494042
P56181_NDUFV3	10.04	-0.14	1	-	0	0.494042
Q8IXZ2_ZC3H3	10.04	-0.14	1	PF00642	2	0.494042
Q7Z3Z3_PIWIL3	10.03	-0.14	1	PF02171,PF02170	2	0.494
Q9UBS9_SUCO	10.03	-0.14	1	-	0	0.494
P61011_SRP54	10.02	-0.14	1	PF00448,PF02881	2	0.660625
P17931_LGALS3	10.02	-0.14	1	-	0	0.493958
P52292_KPNA2	10.01	-0.14	1	-	0	0.493958
Q9HCJ0_TNRC6C	10.01	-0.14	1	PF10427	1	0.493958
Q9NZB2_FAM120A	10	-0.15	1	-	0	0.493917
Q7Z2E3_APTX	9.99	-0.15	1	PF11969,PF00498	2	0.493875
Q9Y2P8_RCL1	9.98	-0.15	1	PF01137,PF05189	2	0.493875
P46060_RANGAP1	9.97	-0.15	1	-	0	0.493833
Q8IV48_ERI1	9.96	-0.15	1	-	0	0.493833
P14678_SNRPB	9.95	-0.15	1	PF01423	1	0.493792
P57052_RBM11	9.95	-0.15	1	PF00076	1	0.493792
Q13884_SNTB1	9.93	-0.15	1	-	0	0.49375
Q9H5Q4_TFB2M	9.93	-0.15	1	PF00398	1	0.49375
Q8N6U8_GPR161	9.92	-0.15	1	-	0	0.493708
Q13409_DYNC1I2	9.91	-0.15	1	-	0	0.493667
Q9BQI3_EIF2AK1	9.91	-0.15	1	-	0	0.493667
Q9H6T0_ESRP2	9.9	-0.15	1	-	0	0.493667
Q8NA58_PNLDC1	9.89	-0.15	1	PF04857	1	0.493625
Q9HD15_SRA1	9.88	-0.15	1	PF07304	1	0.493625
P62306_SNRPF	9.85	-0.16	1	PF01423	1	0.493542
O00178_GTPBP1	9.84	-0.16	1	PF00009	1	0.4935
Q9BYD3_MRPL4	9.83	-0.16	1	PF00573	1	0.4935
Q5H9U9_DDX60L	9.81	-0.16	1	PF00270,PF04851,PF00271	3	0.493417
P07237_P4HB	9.79	-0.16	1	-	0	0.493375
Q6IN84_MRM1	9.78	-0.16	1	PF00588,PF08032	2	0.493333
Q9H6S0_YTHDC2	9.78	-0.16	1	PF04146,PF04408,PF00271,PF01424,PF00270	6	0.493333
Q6P158_DHX57	9.77	-0.16	1	PF04408,PF00271,PF00270,PF00642	4	0.493333
P46778_RPL21	9.76	-0.16	1	PF01157	1	0.493292
Q8N6Y1_PCDH20	9.76	-0.16	1	-	0	0.493292
Q969Z0_TBRG4	9.76	-0.16	1	PF08368,PF06743,PF08373	3	0.493292
Q9UH17_APOBEC3B	9.75	-0.16	1	PF08210,PF05240	4	0.493292
Q9UNK9_ANGEL1	9.74	-0.16	1	PF03372	1	0.49325
Q9GZT3_SLIRP	9.73	-0.16	1	PF00076	1	0.493208
O14730_RIOK3	9.72	-0.16	1	PF01163	1	0.493208
Q16513_PKN2	9.72	-0.16	1	-	0	0.493208
Q9Y2T7_YBX2	9.72	-0.16	1	PF00313	1	0.493208
A2AJT9_BCLAF3	9.71	-0.16	1	PF15440	1	0.493167
Q9Y3B8_REXO2	9.71	-0.16	1	PF00929	1	0.493167
Q8NE18_NSUN7	9.7	-0.16	1	PF01189	1	0.493125
Q1KMD3_HNRNPUL2	9.69	-0.16	1	PF13671,PF00622,PF02037	3	0.493125
Q8ND04_SMG8	9.68	-0.17	1	-	0	0.493083
Q93073_SECISBP2L	9.68	-0.17	1	PF01248	1	0.493083
Q99956_DUSP9	9.68	-0.17	1	-	0	0.493083
Q9BQ48_MRPL34	9.68	-0.17	1	PF00468	1	0.493083
Q8NCV1_ADAD2	9.64	-0.17	1	PF02137,PF00035	2	0.493
Q9BQC6_MRPL57	9.64	-0.17	1	PF14978	1	0.493
Q02978_SLC25A11	9.63	-0.17	1	-	0	0.492958
Q14444_CAPRIN1	9.63	-0.17	1	PF12287	1	0.492958
Q9HCJ3_RAVER2	9.63	-0.17	1	PF00076	3	0.492958
Q15050_RRS1	9.61	-0.17	1	PF04939	1	0.492917
Q13263_TRIM28	9.59	-0.17	1	-	0	0.492875
Q8WWY3_PRPF31	9.59	-0.17	1	PF01798,PF09785	2	0.492875
Q9H8H2_DDX31	9.58	-0.17	1	PF00270,PF00271,PF13959,PF04851	4	0.492833
Q9NXZ2_DDX43	9.55	-0.17	1	PF00270,PF00271,PF00013	3	0.49275
P19525_EIF2AK2	9.53	-0.18	1	PF00035	2	0.492708
Q9H361_PABPC3	9.51	-0.18	1	-	0	0.492667
Q13427_PPIG	9.49	-0.18	1	PF00160	1	0.65925
Q86YF9_DZIP1	9.48	-0.18	1	-	0	0.492583
Q9NXL6_SIDT1	9.47	-0.18	1	PF13965	1	0.492542
Q8NEF9_SRFBP1	9.39	-0.18	1	PF09073	1	0.492333
O95777_LSM8	9.38	-0.18	1	PF01423	1	0.492333
Q7Z6Z7_HUWE1	9.38	-0.18	1	-	0	0.492333
P63162_SNRPN	9.36	-0.19	1	PF01423	1	0.49225
Q9P2P1_NYNRIN	9.36	-0.19	1	PF11977	1	0.49225
Q15654_TRIP6	9.35	-0.19	1	-	0	0.49225
Q13428_TCOF1	9.34	-0.19	1	-	0	0.492208
P50579_METAP2	9.33	-0.19	1	PF00557	1	0.492167
Q15646_OASL	9.33	-0.19	1	PF10421	1	0.492167
Q86UK7_ZNF598	9.33	-0.19	1	-	0	0.492167
Q5JSJ4_INTS6L	9.31	-0.19	1	PF15300	1	0.492125
P80723_BASP1	9.29	-0.19	1	-	0	0.492083
Q8NHQ9_DDX55	9.29	-0.19	1	PF00270,PF00271,PF13959,PF04851	4	0.492083
O60832_DKC1	9.28	-0.19	1	PF08068,PF01509,PF01472	3	0.492042
Q5D0E6_DALRD3	9.28	-0.19	1	PF05746	1	0.492042
Q13084_MRPL28	9.25	-0.19	1	PF00830	1	0.491958
Q7L2E3_DHX30	9.25	-0.19	1	PF00271,PF04408,PF00270	3	0.491958
Q86U90_YRDC	9.25	-0.19	1	PF01300	1	0.491958
O15091_PRORP	9.24	-0.19	1	-	0	0.491958
O00425_IGF2BP3	9.22	-0.19	1	PF00013,PF00076	6	0.491917
Q8IYD1_GSPT2	9.21	-0.2	1	PF00009,PF03143,PF07145	3	0.491875
O14746_TERT	9.19	-0.2	1	PF12009,PF00078	2	0.491833
Q15910_EZH2	9.19	-0.2	1	-	0	0.491833
Q9H1B4_NXF5	9.19	-0.2	1	PF09162	1	0.491833
P49756_RBM25	9.18	-0.2	1	PF01480,PF00076	2	0.491792
Q9HAU5_UPF2	9.18	-0.2	1	PF02854,PF04050	4	0.491792
P49760_CLK2	9.12	-0.2	1	-	0	0.491625
Q9Y2W2_WBP11	9.11	-0.2	1	-	0	0.491625
P83369_LSM11	9.1	-0.2	1	-	0	0.491583
Q15631_TSN	9.1	-0.2	1	PF01997	1	0.491583
Q504Q3_PAN2	9.1	-0.2	1	PF00929	1	0.491583
Q8WTS6_SETD7	9.1	-0.2	1	-	0	0.491583
O43903_GAS2	9.08	-0.2	1	-	0	0.491542
P09429_HMGB1	9.08	-0.2	1	-	0	0.491542
Q13425_SNTB2	9.08	-0.2	1	-	0	0.491542
Q96DP5_MTFMT	9.08	-0.2	1	-	0	0.491542
O95628_CNOT4	9.05	-0.2	1	PF00076	1	0.491458
Q7L0Y3_TRMT10C	9.04	-0.21	1	PF01746	1	0.491417
Q6ZN17_LIN28B	9.03	-0.21	1	PF00313,PF00098	2	0.491417
A6NDE4_RBMY1B	9.02	-0.21	1	PF08081,PF00076	2	0.491375
Q15415_RBMY1F	9.01	-0.21	1	PF08081,PF00076	2	0.491375
Q9HD40_SEPSECS	9	-0.21	1	-	0	0.491333
O43175_PHGDH	8.99	-0.21	1	-	0	0.491292
Q92841_DDX17	8.97	-0.21	1	PF00270,PF00271	2	0.49125
Q9UPY3_DICER1	8.97	-0.21	1	PF00636,PF02170,PF03368,PF14622,PF00271,PF04851,PF00270	8	0.49125
Q8WVM0_TFB1M	8.96	-0.21	1	PF00398	1	0.491208
Q7Z5Q1_CPEB2	8.94	-0.21	1	PF00076	1	0.491167
Q9NQZ3_DAZ1	8.94	-0.21	1	PF00076	3	0.491167
Q8TEA1_NSUN6	8.93	-0.21	1	PF01189,PF13847,PF01728	3	0.491167
P62906_RPL10A	8.92	-0.21	1	PF00687	1	0.491125
Q9P275_USP36	8.92	-0.21	1	-	0	0.491125
Q12906_ILF3	8.91	-0.21	1	PF07528,PF00035	3	0.65775
P23396_RPS3	8.91	-0.21	1	PF00189,PF07650	2	0.491083
Q9Y5L0_TNPO3	8.89	-0.22	1	PF08389	1	0.491042
Q9NS39_ADARB2	8.88	-0.22	1	PF02137,PF00035	3	0.491
Q9NSE4_IARS2	8.88	-0.22	1	PF00133,PF08264,PF09334,PF06827	4	0.491
P82675_MRPS5	8.84	-0.22	1	PF03719,PF00333	2	0.490917
P39687_ANP32A	8.83	-0.22	1	-	0	0.490875
Q9P1Y6_PHRF1	8.83	-0.22	1	PF13639,PF00097,PF13923	3	0.490875
P29558_RBMS1	8.81	-0.22	1	PF00076	2	0.490833
Q96H79_ZC3HAV1L	8.8	-0.22	1	-	0	0.490792
Q9BUT9_MCRIP2	8.8	-0.22	1	-	0	0.490792
Q9UMR2_DDX19B	8.8	-0.22	1	-	0	0.490792
Q96LT9_RNPC3	8.76	-0.22	1	PF00076	2	0.490708
P39748_FEN1	8.75	-0.22	1	-	0	0.490667
Q8WW27_APOBEC4	8.75	-0.22	1	PF08210	1	0.490667
Q14966_ZNF638	8.74	-0.22	1	PF00076,PF12171	2	0.490667
Q8NEJ9_NGDN	8.74	-0.22	1	PF04000	1	0.490667
P0C7P1_RBMY1D	8.73	-0.22	1	PF08081,PF00076	2	0.490625
P0DJD3_RBMY1A1	8.73	-0.22	1	-	0	0.490625
P12081_HARS1	8.73	-0.22	1	PF13393,PF03129,PF12745	3	0.490625
Q9BZE2_PUS3	8.73	-0.22	1	PF01416	1	0.490625
Q96CB9_NSUN4	8.72	-0.23	1	PF01189	1	0.490583
Q9Y3F4_STRAP	8.7	-0.23	1	PF00400	2	0.490542
O94875_SORBS2	8.69	-0.23	1	-	0	0.490542
Q15029_EFTUD2	8.68	-0.23	1	PF00009,PF00679,PF03764,PF03144	4	0.4905
Q99543_DNAJC2	8.67	-0.23	1	-	0	0.490458
O00442_RTCA	8.66	-0.23	1	PF01137,PF05189	2	0.490458
O95104_SCAF4	8.66	-0.23	1	PF00076	1	0.490458
Q15287_RNPS1	8.66	-0.23	1	PF00076	1	0.490458
Q5SY16_NOL9	8.66	-0.23	1	-	0	0.490458
Q9UFF9_CNOT8	8.65	-0.23	1	PF04857	2	0.490417
P46937_YAP1	8.64	-0.23	1	-	0	0.490417
Q5W0B1_OBI1	8.63	-0.23	1	-	0	0.490375
Q9Y4W2_LAS1L	8.63	-0.23	1	PF04031	1	0.490375
Q9H089_LSG1	8.62	-0.23	1	PF01926	1	0.490333
Q07352_ZFP36L1	8.6	-0.23	1	PF00642	2	0.490292
P08195_SLC3A2	8.59	-0.23	1	-	0	0.49025
Q9NWB1_RBFOX1	8.59	-0.23	1	-	0	0.49025
Q86TG7_PEG10	8.58	-0.23	1	-	0	0.49025
Q9HC35_EML4	8.57	-0.24	1	PF00400	2	0.490208
Q9UPN3_MACF1	8.57	-0.24	1	-	0	0.490208
P04439_HLA-A	8.56	-0.24	1	-	0	0.490208
Q00688_FKBP3	8.55	-0.24	1	PF00254	1	0.490167
Q6UXG2_ELAPOR1	8.55	-0.24	1	-	0	0.490167
P78563_ADARB1	8.53	-0.24	1	PF02137,PF00035	3	0.490125
Q9BZI7_UPF3B	8.53	-0.24	1	PF03467	1	0.490125
Q9H6R0_DHX33	8.53	-0.24	1	PF04408,PF00271,PF00270	3	0.490125
Q9H4D5_NXF3	8.52	-0.24	1	PF09162,PF02136	2	0.490083
P33316_DUT	8.51	-0.24	1	-	0	0.490042
P60002_ELOF1	8.51	-0.24	1	-	0	0.490042
Q9BRD0_BUD13	8.51	-0.24	1	PF09736	1	0.490042
Q6PI48_DARS2	8.5	-0.24	1	PF00152,PF02938,PF01336	3	0.490042
Q9UKY7_CDV3	8.5	-0.24	1	-	0	0.490042
A6NEQ0_RBMY1E	8.49	-0.24	1	PF08081,PF00076	2	0.49
Q01860_POU5F1	8.47	-0.24	1	-	0	0.489958
Q9BRU9_UTP23	8.47	-0.24	1	PF04900	1	0.489958
Q6ZSC3_RBM43	8.46	-0.24	1	-	0	0.489917
Q8IY37_DHX37	8.46	-0.24	1	PF04408,PF00270,PF00271	3	0.489917
Q96EV2_RBM33	8.46	-0.24	1	-	0	0.489917
Q9UBU9_NXF1	8.45	-0.24	1	PF09162,PF02136,PF03943	3	0.489917
Q9H649_NSUN3	8.44	-0.24	1	PF01189	1	0.489875
P49591_SARS1	8.43	-0.24	1	PF00587,PF02403	2	0.489833
Q8N1G1_REXO1	8.42	-0.24	1	-	0	0.489833
Q969Q0_RPL36AL	8.42	-0.24	1	PF00935	1	0.489833
P49642_PRIM1	8.4	-0.24	1	-	0	0.489792
Q9NY12_GAR1	8.4	-0.24	1	PF04410	1	0.489792
Q13155_AIMP2	8.39	-0.25	1	-	0	0.48975
Q8IZL8_PELP1	8.37	-0.25	1	PF08167	1	0.489708
Q8WXF1_PSPC1	8.37	-0.25	1	PF00076,PF08075	3	0.489708
P49759_CLK1	8.36	-0.25	1	-	0	0.489667
Q92600_CNOT9	8.36	-0.25	1	-	0	0.489667
Q96T37_RBM15	8.36	-0.25	1	PF07744,PF00076	3	0.489667
P57081_WDR4	8.33	-0.25	1	-	0	0.489583
Q9UI43_MRM2	8.33	-0.25	1	PF01728	1	0.489583
O14879_IFIT3	8.32	-0.25	1	-	0	0.489583
O75369_FLNB	8.31	-0.25	1	-	0	0.489542
Q9UGC7_MTRF1L	8.31	-0.25	1	PF00472	1	0.489542
P51398_DAP3	8.3	-0.25	1	PF10236	1	0.4895
P62917_RPL8	8.3	-0.25	1	PF03947,PF00181	2	0.4895
Q6L8Q7_PDE12	8.3	-0.25	1	PF03372	1	0.4895
P51911_CNN1	8.29	-0.25	1	-	0	0.4895
O95985_TOP3B	8.28	-0.25	1	PF01751	1	0.489458
P49419_ALDH7A1	8.27	-0.25	1	-	0	0.489458
Q13117_DAZ2	8.27	-0.25	1	PF00076	1	0.489458
Q86U38_NOP9	8.27	-0.25	1	-	0	0.489458
O75554_WBP4	8.26	-0.25	1	PF06220	1	0.489417
P15170_GSPT1	8.26	-0.25	1	PF00009,PF03143,PF03144	3	0.489417
Q8TB72_PUM2	8.26	-0.25	1	PF00806	8	0.489417
Q6AI08_HEATR6	8.25	-0.26	1	-	0	0.489375
Q14258_TRIM25	8.24	-0.26	1	PF00622,PF00097,PF13639,PF13923	4	0.489375
P22087_FBL	8.23	-0.26	1	PF01269,PF08704	2	0.489333
Q9NZM5_NOP53	8.22	-0.26	1	PF07767	1	0.489292
Q9HBD1_RC3H2	8.2	-0.26	1	PF00642	1	0.48925
Q16658_FSCN1	8.19	-0.26	1	-	0	0.48925
Q9UK39_NOCT	8.19	-0.26	1	PF03372	1	0.48925
Q5JPH6_EARS2	8.17	-0.26	1	PF00749	1	0.489167
Q01804_OTUD4	8.16	-0.26	1	-	0	0.489167
Q9H074_PAIP1	8.16	-0.26	1	PF02854,PF07145	2	0.489167
Q92989_CLP1	8.15	-0.26	1	PF06807	1	0.489125
Q9NUL7_DDX28	8.12	-0.26	1	PF00270,PF00271	2	0.489042
Q96QC0_PPP1R10	8.11	-0.26	1	PF00642	1	0.489042
P52594_AGFG1	8.09	-0.26	1	-	0	0.488958
Q13242_SRSF9	8.09	-0.26	1	PF00076	2	0.488958
O75122_CLASP2	8.08	-0.26	1	-	0	0.488958
Q13283_G3BP1	8.08	-0.26	1	PF02136,PF00076	2	0.488958
Q9NUP7_TRMT13	8.08	-0.26	1	PF05206,PF11722,PF05253	3	0.488958
Q9Y312_AAR2	8.08	-0.26	1	PF05282	1	0.488958
Q8TED0_UTP15	8.07	-0.27	1	PF09384,PF00400	3	0.488917
Q9H694_BICC1	8.06	-0.27	1	PF00013	2	0.488875
O75175_CNOT3	8.04	-0.27	1	PF04065,PF04153	2	0.488833
P51858_HDGF	8.03	-0.27	1	-	0	0.488833
Q8ND56_LSM14A	8.03	-0.27	1	PF12701,PF09532,PF14438	3	0.488833
Q9UI10_EIF2B4	8.02	-0.27	1	PF01008	1	0.488792
O00584_RNASET2	8.01	-0.27	1	PF00445	1	0.48875
Q5U5Q3_MEX3C	8.01	-0.27	1	PF00013,PF00097	3	0.48875
P25705_ATP5F1A	7.98	-0.27	1	-	0	0.488667
P48651_PTDSS1	7.98	-0.27	1	-	0	0.488667
Q13561_DCTN2	7.98	-0.27	1	-	0	0.488667
Q9H7E2_TDRD3	7.98	-0.27	1	PF08585,PF00567,PF06003	3	0.488667
Q9BRP7_FDXACB1	7.97	-0.27	1	PF03147	1	0.488667
P68104_EEF1A1	7.96	-0.27	1	PF00009,PF03143,PF03144	3	0.488625
Q9Y2S6_TMA7	7.95	-0.27	1	-	0	0.488625
P79522_PRR3	7.94	-0.27	1	PF00642	1	0.488583
Q96G46_DUS3L	7.93	-0.28	1	PF01207	1	0.488542
P16989_YBX3	7.92	-0.28	1	PF00313	1	0.488542
Q8N2M8_CLASRP	7.92	-0.28	1	PF09750	1	0.488542
Q9NZN8_CNOT2	7.92	-0.28	1	PF04153	1	0.488542
Q96L21_RPL10L	7.91	-0.28	1	PF00252	1	0.4885
Q9H444_CHMP4B	7.9	-0.28	1	-	0	0.488458
P60900_PSMA6	7.89	-0.28	1	-	0	0.488458
O43347_MSI1	7.88	-0.28	1	PF00076	2	0.488417
Q14247_CTTN	7.88	-0.28	1	-	0	0.488417
P57721_PCBP3	7.85	-0.28	1	PF00013,PF07650	4	0.488333
Q13325_IFIT5	7.85	-0.28	1	PF07719,PF13181	2	0.488333
Q14103_HNRNPD	7.85	-0.28	1	PF00076,PF08143	3	0.488333
Q6PI26_SHQ1	7.85	-0.28	1	PF04925	1	0.488333
Q5TC82_RC3H1	7.83	-0.28	1	PF00642	1	0.488292
P09651_HNRNPA1	7.82	-0.28	1	PF00076,PF11627	3	0.654958
Q8NE71_ABCF1	7.82	-0.28	1	-	0	0.488292
Q99729_HNRNPAB	7.82	-0.28	1	PF00076,PF08143	3	0.488292
O00418_EEF2K	7.81	-0.28	1	-	0	0.48825
Q96PZ0_PUS7	7.81	-0.28	1	PF01142	1	0.48825
P55209_NAP1L1	7.79	-0.28	1	-	0	0.488208
P02771_AFP	7.78	-0.28	1	-	0	0.488167
P50995_ANXA11	7.78	-0.28	1	-	0	0.488167
P26196_DDX6	7.75	-0.29	1	PF00270,PF00271	2	0.488083
Q96IZ7_RSRC1	7.75	-0.29	1	-	0	0.488083
Q9NUD5_ZCCHC3	7.75	-0.29	1	-	0	0.488083
P54577_YARS1	7.74	-0.29	1	PF00579,PF01588	2	0.488083
Q15291_RBBP5	7.74	-0.29	1	PF00400	1	0.488083
Q9BVP2_GNL3	7.74	-0.29	1	PF08701,PF01926	2	0.488083
Q9NUL3_STAU2	7.74	-0.29	1	PF00035	4	0.488083
Q9H974_QTRT2	7.73	-0.29	1	PF01702	1	0.488042
Q96EH5_RPL39L	7.72	-0.29	1	PF00832	1	0.488
Q9P2W9_STX18	7.72	-0.29	1	-	0	0.488
A2RUC4_TYW5	7.71	-0.29	1	-	0	0.488
P83881_RPL36A	7.71	-0.29	1	PF00935	1	0.488
Q14498_RBM39	7.71	-0.29	1	PF00076	2	0.488
Q9H7Z6_KAT8	7.7	-0.29	1	PF11717	1	0.487958
Q8IZ73_RPUSD2	7.65	-0.29	1	PF00849	1	0.487833
Q9NUU7_DDX19A	7.65	-0.29	1	PF00270,PF00271	2	0.487833
Q9Y3I0_RTCB	7.64	-0.29	1	PF01139	1	0.487792
Q86TM3_DDX53	7.62	-0.29	1	PF00270,PF00271,PF00013	3	0.48775
Q8WWM7_ATXN2L	7.61	-0.3	1	PF14438,PF06741,PF07145	3	0.487708
Q9UQ80_PA2G4	7.59	-0.3	1	PF00557	1	0.487667
P04080_CSTB	7.58	-0.3	1	-	0	0.487667
P06576_ATP5F1B	7.58	-0.3	1	-	0	0.487667
O60563_CCNT1	7.57	-0.3	1	-	0	0.487625
Q8IUH3_RBM45	7.57	-0.3	1	PF00076	4	0.487625
P52272_HNRNPM	7.54	-0.3	1	PF00076,PF11532	4	0.654208
O60506_SYNCRIP	7.54	-0.3	1	PF00076,PF13893	4	0.487542
Q9NX74_DUS2	7.53	-0.3	1	PF01207,PF00035	2	0.4875
P49590_HARS2	7.52	-0.3	1	PF13393,PF03129,PF12745	3	0.4875
P27635_RPL10	7.51	-0.3	1	PF00252	1	0.487458
P35611_ADD1	7.51	-0.3	1	-	0	0.487458
P62891_RPL39	7.51	-0.3	1	PF00832	1	0.487458
Q9Y224_RTRAF	7.48	-0.3	1	-	0	0.487375
Q9BUJ2_HNRNPUL1	7.47	-0.3	1	PF13671,PF00622,PF02037	3	0.487375
Q9UHX1_PUF60	7.47	-0.3	1	PF00076	2	0.487375
Q96MU7_YTHDC1	7.46	-0.3	1	PF04146	2	0.487333
Q9GZY0_NXF2	7.46	-0.3	1	PF09162,PF03943,PF02136	3	0.487333
O95232_LUC7L3	7.43	-0.31	1	PF03194	1	0.48725
Q8N8U3_RTL3	7.43	-0.31	1	PF00098	1	0.48725
Q9BTD8_RBM42	7.4	-0.31	1	PF00076	1	0.487167
Q9NZI8_IGF2BP1	7.4	-0.31	1	PF00013,PF00076	6	0.487167
O43172_PRPF4	7.39	-0.31	1	PF00400,PF08799	4	0.487167
Q13064_MKRN3	7.38	-0.31	1	PF14608,PF00097	3	0.487125
Q96P11_NSUN5	7.37	-0.31	1	PF01189	1	0.487125
Q9BRS8_LARP6	7.37	-0.31	1	PF05383,PF12901	2	0.487125
Q86SE5_RALYL	7.36	-0.31	1	PF00076	1	0.487083
Q9NRJ5_PAPOLB	7.34	-0.31	1	PF04926	1	0.487042
Q9NX63_CHCHD3	7.34	-0.31	1	-	0	0.487042
Q14331_FRG1	7.33	-0.31	1	PF06229	1	0.487
Q9Y5A9_YTHDF2	7.33	-0.31	1	PF04146	1	0.487
P48431_SOX2	7.31	-0.31	1	-	0	0.486958
Q86XZ4_SPATS2	7.29	-0.31	1	PF07139	1	0.486917
Q96E39_RBMXL1	7.29	-0.31	1	PF00076,PF08081	2	0.486917
Q9UHL0_DDX25	7.29	-0.31	1	PF00270,PF00271	2	0.486917
P31946_YWHAB	7.25	-0.32	1	PF00244	1	0.486792
Q8TBY0_RBM46	7.25	-0.32	1	-	0	0.486792
Q6YP21_KYAT3	7.24	-0.32	1	-	0	0.48675
Q96QR8_PURB	7.22	-0.32	1	PF04845	1	0.486708
Q9HAZ1_CLK4	7.22	-0.32	1	-	0	0.486708
Q15637_SF1	7.21	-0.32	1	PF00013,PF00098	2	0.486708
O15143_ARPC1B	7.19	-0.32	1	PF00400	1	0.486625
P09972_ALDOC	7.17	-0.32	1	-	0	0.486583
Q15365_PCBP1	7.17	-0.32	1	PF00013	3	0.486583
Q05639_EEF1A2	7.15	-0.32	1	PF00009,PF03143,PF03144	3	0.486542
Q13601_KRR1	7.13	-0.32	1	-	0	0.4865
Q9BRS2_RIOK1	7.13	-0.32	1	PF01163	1	0.4865
Q96KP4_CNDP2	7.12	-0.32	1	-	0	0.486458
Q9Y2C4_EXOG	7.12	-0.32	1	PF01223	1	0.486458
P11182_DBT	7.09	-0.33	1	-	0	0.486375
Q6ZUT6_CCDC9B	7.09	-0.33	1	-	0	0.486375
P18615_NELFE	7.08	-0.33	1	PF00076	1	0.486375
Q9HD33_MRPL47	7.08	-0.33	1	PF06984	1	0.486375
P35269_GTF2F1	7.07	-0.33	1	PF05793	1	0.486333
P51843_NR0B1	7.06	-0.33	1	-	0	0.486292
Q9UJV9_DDX41	7.06	-0.33	1	PF00270,PF00271	2	0.486292
Q8WVV9_HNRNPLL	7.02	-0.33	1	PF13893,PF00076	3	0.486208
Q9BU76_MMTAG2	7	-0.33	1	-	0	0.486167
Q9P2K5_MYEF2	6.99	-0.33	1	PF00076	3	0.486125
O15047_SETD1A	6.97	-0.33	1	PF00076	1	0.486083
P26038_MSN	6.97	-0.33	1	-	0	0.486083
P49411_TUFM	6.97	-0.33	1	PF00009,PF03143,PF03144	3	0.486083
O60583_CCNT2	6.96	-0.34	1	-	0	0.486042
Q9BRX9_WDR83	6.94	-0.34	1	PF00400	3	0.486
Q7L4I2_RSRC2	6.93	-0.34	1	-	0	0.485958
P41214_EIF2D	6.91	-0.34	1	PF01253	1	0.485917
Q8WVK2_SNRNP27	6.9	-0.34	1	-	0	0.485875
Q96GM8_TOE1	6.87	-0.34	1	PF04857,PF00642	3	0.485792
Q9H7N4_SCAF1	6.87	-0.34	1	-	0	0.485792
P11137_MAP2	6.86	-0.34	1	-	0	0.485792
Q8WUA2_PPIL4	6.86	-0.34	1	PF00160,PF00076	2	0.485792
Q99733_NAP1L4	6.86	-0.34	1	-	0	0.485792
Q9NWZ8_GEMIN8	6.85	-0.34	1	PF15348	1	0.48575
Q16206_ENOX2	6.84	-0.34	1	PF00076	1	0.48575
Q5ST30_VARS2	6.83	-0.34	1	PF00133,PF08264,PF09334	3	0.485708
P35659_DEK	6.82	-0.34	1	-	0	0.485667
Q92665_MRPS31	6.82	-0.34	1	PF15433	1	0.485667
P38159_RBMX	6.81	-0.34	1	PF00076,PF08081	2	0.485667
P43897_TSFM	6.81	-0.34	1	PF00889	1	0.485667
Q13485_SMAD4	6.81	-0.34	1	-	0	0.485667
Q8TBF4_ZCRB1	6.81	-0.34	1	PF00076,PF13893,PF00098	3	0.485667
P18077_RPL35A	6.8	-0.34	1	PF01247	1	0.485625
Q8N2G6_ZCCHC24	6.79	-0.35	1	PF13696	1	0.485583
O00567_NOP56	6.77	-0.35	1	PF01798,PF08156	2	0.485542
P63104_YWHAZ	6.77	-0.35	1	PF00244	1	0.485542
Q08752_PPID	6.77	-0.35	1	PF00160	1	0.485542
Q86XN8_MEX3D	6.77	-0.35	1	PF00013	2	0.485542
Q5T1V6_DDX59	6.76	-0.35	1	-	0	0.485542
O94992_HEXIM1	6.75	-0.35	1	PF15313	1	0.4855
Q13686_ALKBH1	6.69	-0.35	1	PF13532	1	0.485333
Q9HCE5_METTL14	6.69	-0.35	1	-	0	0.485333
O43390_HNRNPR	6.68	-0.35	1	PF00076	3	0.485333
P05388_RPLP0	6.66	-0.35	1	PF00466,PF00428	2	0.48525
Q99551_MTERF1	6.66	-0.35	1	PF02536	1	0.48525
Q96B70_LENG9	6.64	-0.36	1	PF10469	1	0.485208
P0CB38_PABPC4L	6.62	-0.36	1	PF00076	4	0.485167
Q96EP5_DAZAP1	6.62	-0.36	1	PF00076	2	0.485167
Q96HN2_AHCYL2	6.62	-0.36	1	-	0	0.485167
P31942_HNRNPH3	6.61	-0.36	1	PF00076	2	0.651792
P55259_GP2	6.61	-0.36	1	-	0	0.485125
Q5TBB1_RNASEH2B	6.61	-0.36	1	PF09468	1	0.485125
Q7L2J0_MEPCE	6.6	-0.36	1	PF06859,PF13847	2	0.485125
Q9UHK0_NUFIP1	6.59	-0.36	1	PF10453,PF12171	2	0.485083
Q5T481_RBM20	6.58	-0.36	1	-	0	0.485042
Q96AE4_FUBP1	6.57	-0.36	1	PF00013,PF07650,PF09005	8	0.485042
Q96M93_ADAD1	6.55	-0.36	1	PF02137,PF00035	2	0.485
Q86TN4_TRPT1	6.54	-0.36	1	PF01885	1	0.484958
Q9NY61_AATF	6.54	-0.36	1	-	0	0.484958
Q6PIY7_TENT2	6.52	-0.36	1	PF03828	1	0.484917
Q8IZD4_DCP1B	6.52	-0.36	1	PF06058	1	0.484917
Q9BT17_MTG1	6.52	-0.36	1	PF01926	1	0.484917
O43447_PPIH	6.51	-0.36	1	PF00160	1	0.484875
Q7Z6J9_TSEN54	6.51	-0.36	1	PF12928	1	0.484875
Q9UKZ1_CNOT11	6.51	-0.36	1	PF10155	1	0.484875
Q96L12_CALR3	6.5	-0.36	1	PF00262	2	0.484833
Q9C0B1_FTO	6.5	-0.36	1	-	0	0.484833
P51114_FXR1	6.47	-0.36	1	PF12235,PF00013,PF05641	4	0.484792
Q9BYD6_MRPL1	6.47	-0.36	1	PF00687	1	0.484792
Q96DU9_PABPC5	6.44	-0.37	1	-	0	0.484708
O76021_RSL1D1	6.43	-0.37	1	PF00687	1	0.484667
O60812_HNRNPCL1	6.42	-0.37	1	PF00076	1	0.484625
O75475_PSIP1	6.42	-0.37	1	-	0	0.484625
Q9UIV1_CNOT7	6.4	-0.37	1	PF04857	2	0.484583
Q96GJ1_TRMT2B	6.37	-0.37	1	PF05958,PF13847,PF05175	3	0.4845
Q07666_KHDRBS1	6.35	-0.37	1	PF00013	1	0.484458
Q32P41_TRMT5	6.35	-0.37	1	PF02475	1	0.484458
O43310_CTIF	6.34	-0.37	1	PF02854	1	0.484417
Q99873_PRMT1	6.32	-0.38	1	PF05175	1	0.484375
O95363_FARS2	6.31	-0.38	1	PF01409,PF03147	3	0.484375
P63167_DYNLL1	6.3	-0.38	1	-	0	0.484333
Q5SZQ8_CELF3	6.28	-0.38	1	PF00076	3	0.484292
Q9UKA9_PTBP2	6.28	-0.38	1	PF13893,PF00076	5	0.484292
Q9GZS1_POLR1E	6.27	-0.38	1	PF06870	1	0.48425
Q6P1R4_DUS1L	6.25	-0.38	1	PF01207	1	0.484208
Q8IWZ8_SUGP1	6.25	-0.38	1	PF01805,PF01585,PF12656	4	0.484208
Q9BUB4_ADAT1	6.25	-0.38	1	PF02137	1	0.484208
Q92664_GTF3A	6.22	-0.38	1	PF00096,PF12874	5	0.484125
Q12972_PPP1R8	6.17	-0.38	1	PF00498	1	0.484
Q9H972_C14orf93	6.16	-0.38	1	-	0	0.483958
Q8WTR7_ZNF473	6.15	-0.38	1	PF00096	10	0.483958
Q9Y2Z4_YARS2	6.15	-0.38	1	PF00579	1	0.483958
Q96DH6_MSI2	6.14	-0.39	1	PF00076	2	0.650583
P09960_LTA4H	6.12	-0.39	1	-	0	0.483875
Q9H6F5_CCDC86	6.12	-0.39	1	PF03879	1	0.483875
Q12905_ILF2	6.11	-0.39	1	PF07528	1	0.483833
Q15717_ELAVL1	6.11	-0.39	1	PF00076	3	0.483833
P20073_ANXA7	6.06	-0.39	1	-	0	0.483708
P13861_PRKAR2A	6.05	-0.39	1	-	0	0.483667
Q8IWS0_PHF6	6.01	-0.39	1	-	0	0.483583
Q96SZ6_CDK5RAP1	6	-0.4	1	-	0	0.483542
Q92917_GPKOW	5.99	-0.4	1	-	0	0.483542
Q15366_PCBP2	5.98	-0.4	1	PF00013	3	0.4835
P61619_SEC61A1	5.97	-0.4	1	-	0	0.483458
Q9H668_STN1	5.97	-0.4	1	PF01336	1	0.483458
Q8WWB5_PIH1D2	5.94	-0.4	1	PF08190	1	0.483417
Q96I59_NARS2	5.91	-0.4	1	PF00152,PF01336	2	0.483333
P09914_IFIT1	5.89	-0.4	1	PF13181	1	0.48325
Q8NCE0_TSEN2	5.89	-0.4	1	PF02778,PF01974	2	0.48325
Q9Y3Y2_CHTOP	5.88	-0.4	1	-	0	0.48325
Q96AG4_LRRC59	5.87	-0.4	1	-	0	0.483208
Q9BTF0_THUMPD2	5.87	-0.4	1	PF01170,PF13847,PF02926,PF05175	4	0.483208
Q15797_SMAD1	5.86	-0.4	1	-	0	0.483208
Q16181_SEPTIN7	5.85	-0.4	1	PF01926	1	0.483167
Q86WB0_ZC3HC1	5.84	-0.4	1	PF07967,PF08600	2	0.483125
Q8N5F7_NKAP	5.84	-0.4	1	-	0	0.483125
Q9UBV8_PEF1	5.84	-0.4	1	-	0	0.483125
O15523_DDX3Y	5.83	-0.4	1	PF00270,PF00271	2	0.483125
Q9Y6V7_DDX49	5.83	-0.4	1	PF00270,PF00271,PF04851	3	0.483125
O43670_ZNF207	5.82	-0.41	1	-	0	0.483083
P17509_HOXB6	5.82	-0.41	1	-	0	0.483083
P24534_EEF1B2	5.81	-0.41	1	PF00736	1	0.483083
Q9UJJ7_RPUSD1	5.81	-0.41	1	PF00849	1	0.483083
Q53F19_NCBP3	5.8	-0.41	1	PF10309	1	0.483042
Q92879_CELF1	5.8	-0.41	1	PF00076	3	0.483042
Q06787_FMR1	5.78	-0.41	1	PF12235,PF00013,PF05641	4	0.649667
Q9NSD9_FARSB	5.77	-0.41	1	PF03483,PF03484	2	0.482958
Q9NYK5_MRPL39	5.77	-0.41	1	-	0	0.482958
Q8NCA5_FAM98A	5.73	-0.41	1	PF10239	1	0.482875
P31146_CORO1A	5.72	-0.41	1	PF00400	1	0.482833
O43660_PLRG1	5.71	-0.41	1	PF00400	5	0.482792
P10155_RO60	5.71	-0.41	1	-	0	0.482792
P62258_YWHAE	5.7	-0.41	1	PF00244	1	0.482792
Q96CX2_KCTD12	5.7	-0.41	1	-	0	0.482792
Q9NTK5_OLA1	5.69	-0.41	1	PF01926	1	0.48275
P33240_CSTF2	5.68	-0.42	1	PF14327,PF00076,PF14304	3	0.482708
Q8TE67_EPS8L3	5.67	-0.42	1	-	0	0.482708
Q9Y3T6_R3HCC1	5.66	-0.42	1	PF01424	1	0.482667
Q6UX04_CWC27	5.65	-0.42	1	PF00160	1	0.482667
O15427_SLC16A3	5.64	-0.42	1	-	0	0.482625
P55039_DRG2	5.64	-0.42	1	PF01926	1	0.482625
P61981_YWHAG	5.64	-0.42	1	PF00244	1	0.482625
O15504_NUP42	5.63	-0.42	1	-	0	0.482583
Q9BRX2_PELO	5.61	-0.42	1	PF03463,PF03464,PF03465	3	0.482542
Q9BV44_THUMPD3	5.61	-0.42	1	PF01170,PF02926	2	0.482542
Q9NR90_DAZ3	5.61	-0.42	1	-	0	0.482542
P48444_ARCN1	5.6	-0.42	1	-	0	0.4825
P14618_PKM	5.57	-0.42	1	-	0	0.482458
Q15125_EBP	5.57	-0.42	1	-	0	0.482458
P07910_HNRNPC	5.56	-0.42	1	PF00076	1	0.482417
P42765_ACAA2	5.54	-0.42	1	-	0	0.482375
P07585_DCN	5.53	-0.42	1	-	0	0.482333
P63244_RACK1	5.53	-0.42	1	PF00400	5	0.482333
P61764_STXBP1	5.52	-0.42	1	-	0	0.482292
P61221_ABCE1	5.5	-0.43	1	-	0	0.48225
Q9UBM7_DHCR7	5.49	-0.43	1	PF01222	1	0.48225
P13489_RNH1	5.48	-0.43	1	-	0	0.482208
Q8NG50_RDM1	5.47	-0.43	1	PF00076	1	0.482167
Q9BZE1_MRPL37	5.43	-0.43	1	PF07147	1	0.482083
Q9Y285_FARSA	5.43	-0.43	1	PF01409	1	0.482083
Q96KC8_DNAJC1	5.42	-0.43	1	-	0	0.482042
P05412_JUN	5.41	-0.43	1	-	0	0.482042
P42696_RBM34	5.4	-0.43	1	PF00076	2	0.482
P50454_SERPINH1	5.4	-0.43	1	-	0	0.482
Q5VZ19_TDRD10	5.4	-0.43	1	PF00567,PF00076	2	0.482
Q9BRL6_SRSF8	5.4	-0.43	1	PF00076	1	0.482
Q96D46_NMD3	5.37	-0.43	1	PF04981	1	0.481917
Q9UGM6_WARS2	5.37	-0.43	1	PF00579	1	0.481917
P62495_ETF1	5.36	-0.43	1	PF03464,PF03465,PF03463	3	0.481917
Q96CM3_RPUSD4	5.36	-0.43	1	PF00849	1	0.481917
Q7L3T8_PARS2	5.35	-0.44	1	PF00587,PF03129	2	0.481875
Q8TAD8_SNIP1	5.35	-0.44	1	PF00498	1	0.481875
Q99717_SMAD5	5.34	-0.44	1	-	0	0.481833
Q8N684_CPSF7	5.32	-0.44	1	PF00076	1	0.481792
Q96F86_EDC3	5.32	-0.44	1	PF09532,PF12701	2	0.481792
Q96IZ0_PAWR	5.32	-0.44	1	-	0	0.481792
P08670_VIM	5.3	-0.44	1	-	0	0.48175
P82933_MRPS9	5.3	-0.44	1	PF00380	1	0.48175
P47974_ZFP36L2	5.29	-0.44	1	PF00642	2	0.481708
O75526_RBMXL2	5.28	-0.44	1	PF00076,PF08081	2	0.481708
O15234_CASC3	5.25	-0.44	1	PF09405	1	0.481625
Q9NPD3_EXOSC4	5.24	-0.44	1	PF01138,PF03725	2	0.481583
P29401_TKT	5.23	-0.44	1	-	0	0.481542
P50991_CCT4	5.23	-0.44	1	-	0	0.481542
P57772_EEFSEC	5.22	-0.44	1	PF00009,PF01926	2	0.481542
Q00266_MAT1A	5.22	-0.44	1	-	0	0.481542
P11142_HSPA8	5.21	-0.44	1	-	0	0.4815
O00571_DDX3X	5.19	-0.44	1	PF00270,PF00271	2	0.481458
O15446_POLR1G	5.17	-0.45	1	PF08208	1	0.481417
Q9ULM6_CNOT6	5.17	-0.45	1	PF03372	1	0.481417
O43541_SMAD6	5.16	-0.45	1	-	0	0.481375
P57723_PCBP4	5.16	-0.45	1	PF00013	3	0.481375
Q8N5P1_ZC3H8	5.14	-0.45	1	PF00642	2	0.481333
Q9BY77_POLDIP3	5.14	-0.45	1	PF00076	1	0.481333
Q9UMX0_UBQLN1	5.13	-0.45	1	-	0	0.481292
Q8N3Z6_ZCCHC7	5.12	-0.45	1	PF00098	1	0.481292
O43251_RBFOX2	5.11	-0.45	1	PF12414,PF00076	2	0.48125
Q9H5H4_ZNF768	5.1	-0.45	1	PF00096	10	0.481208
P61513_RPL37A	5.09	-0.45	1	PF01780	1	0.481208
O00541_PES1	5.06	-0.45	1	PF06732	1	0.481125
Q9BTE6_AARSD1	5.06	-0.45	1	PF07973	1	0.481125
Q9NWS0_PIH1D1	5.06	-0.45	1	PF08190	1	0.481125
P26599_PTBP1	5.05	-0.45	1	PF13893,PF00076	6	0.814417
P26651_ZFP36	5.04	-0.45	1	PF00642,PF14608	3	0.481083
P55036_PSMD4	5.04	-0.45	1	-	0	0.481083
Q9BX10_GTPBP2	5.04	-0.45	1	PF00009	1	0.481083
Q9UHR5_SAP30BP	5.04	-0.45	1	-	0	0.481083
P04075_ALDOA	5.03	-0.46	1	-	0	0.481042
Q4VXU2_PABPC1L	5.03	-0.46	1	PF00076,PF00658	5	0.481042
Q15434_RBMS2	5.02	-0.46	1	PF00076	2	0.481
Q96PM9_ZNF385A	5.02	-0.46	1	PF12874,PF12171	4	0.481
Q969Y2_GTPBP3	5	-0.46	1	PF01926	1	0.480958
Q96HC4_PDLIM5	4.99	-0.46	1	-	0	0.480958
Q9UMS4_PRPF19	4.99	-0.46	1	PF00400,PF08606	3	0.480958
O75131_CPNE3	4.97	-0.46	1	-	0	0.480875
P82673_MRPS35	4.96	-0.46	1	PF10213	1	0.480875
Q8NAF0_ZNF579	4.96	-0.46	1	PF00096	2	0.480875
P51513_NOVA1	4.92	-0.46	1	PF00013	3	0.647417
P30419_NMT1	4.92	-0.46	1	-	0	0.48075
P40926_MDH2	4.91	-0.46	1	-	0	0.48075
Q92597_NDRG1	4.9	-0.46	1	-	0	0.480708
Q7L2H7_EIF3M	4.88	-0.46	1	-	0	0.480667
O95793_STAU1	4.83	-0.47	1	PF00035	3	0.480542
O95319_CELF2	4.82	-0.47	1	PF00076	3	0.4805
Q96N16_JAKMIP1	4.8	-0.47	1	-	0	0.480458
P62753_RPS6	4.74	-0.47	1	PF01092	1	0.480292
Q9UKM9_RALY	4.74	-0.47	1	PF00076	1	0.480292
Q8WTP8_AEN	4.72	-0.47	1	PF00929	1	0.48025
A2A288_ZC3H12D	4.71	-0.48	1	PF11977	1	0.480208
Q5T764_IFIT1B	4.7	-0.48	1	-	0	0.480167
Q01844_EWSR1	4.68	-0.48	1	PF00641,PF00076	2	0.480125
Q9NV06_DCAF13	4.68	-0.48	1	PF04158,PF00400,PF08662	3	0.480125
A1L020_MEX3A	4.66	-0.48	1	PF00013,PF00097	3	0.480083
Q12849_GRSF1	4.66	-0.48	1	PF00076	1	0.480083
Q8N9N2_ASCC1	4.66	-0.48	1	PF10469,PF00013	2	0.480083
O60610_DIAPH1	4.64	-0.48	1	-	0	0.480042
P41091_EIF2S3	4.64	-0.48	1	PF09173,PF00009,PF03144	3	0.480042
Q9H0S4_DDX47	4.62	-0.48	1	PF00270,PF00271,PF04851	3	0.48
Q9NP81_SARS2	4.62	-0.48	1	PF00587	1	0.48
Q96FB5_RRNAD1	4.61	-0.48	1	-	0	0.479958
Q9Y3Z3_SAMHD1	4.61	-0.48	1	-	0	0.479958
Q92769_HDAC2	4.6	-0.48	1	-	0	0.479917
Q9GZR2_REXO4	4.59	-0.48	1	PF00929	1	0.479917
Q7Z4G4_TRMT11	4.57	-0.48	1	PF01170	1	0.479833
Q6IBS0_TWF2	4.52	-0.49	1	-	0	0.479708
Q9BVS4_RIOK2	4.52	-0.49	1	PF01163	1	0.479708
Q06265_EXOSC9	4.47	-0.49	1	PF01138,PF03725	2	0.479583
Q5T280_SPOUT1	4.47	-0.49	1	PF02598	1	0.479583
Q8IUX4_APOBEC3F	4.47	-0.49	1	PF08210,PF05240	4	0.479583
O43159_RRP8	4.45	-0.49	1	PF05148	1	0.479542
Q2VPK5_CTU2	4.45	-0.49	1	-	0	0.479542
Q6P087_RPUSD3	4.44	-0.49	1	PF00849	1	0.4795
P31948_STIP1	4.41	-0.49	1	PF00515,PF07719,PF13414,PF13181	8	0.479417
P06733_ENO1	4.4	-0.49	1	-	0	0.479417
P27797_CALR	4.39	-0.5	1	PF00262	2	0.479375
Q7L1Q6_BZW1	4.39	-0.5	1	PF02020	1	0.479375
Q9NY93_DDX56	4.37	-0.5	1	PF00270,PF00271,PF04851	3	0.479333
Q9Y230_RUVBL2	4.36	-0.5	1	-	0	0.479292
Q9Y6E2_BZW2	4.36	-0.5	1	PF02020	1	0.479292
P82921_MRPS21	4.34	-0.5	1	PF01165	1	0.47925
O15198_SMAD9	4.33	-0.5	1	-	0	0.479208
P78406_RAE1	4.32	-0.5	1	PF00400	1	0.479208
Q5TA45_INTS11	4.32	-0.5	1	PF10996,PF07521,PF00753	3	0.479208
Q96DF8_ESS2	4.32	-0.5	1	PF09751	1	0.479208
O95429_BAG4	4.31	-0.5	1	-	0	0.479167
Q5T3I0_GPATCH4	4.29	-0.5	1	PF01585	1	0.479125
P09622_DLD	4.28	-0.5	1	-	0	0.479083
Q9NUQ6_SPATS2L	4.28	-0.5	1	PF07139	1	0.479083
Q96CB8_INTS12	4.27	-0.5	1	-	0	0.479083
Q9NXH9_TRMT1	4.27	-0.5	1	PF02005,PF00642,PF02475	3	0.479083
Q9UGI8_TES	4.27	-0.5	1	-	0	0.479083
Q9Y5K5_UCHL5	4.27	-0.5	1	PF01088	1	0.479083
Q05519_SRSF11	4.26	-0.5	1	PF00076	1	0.479042
Q7Z739_YTHDF3	4.26	-0.5	1	PF04146	2	0.479042
P09913_IFIT2	4.19	-0.51	1	-	0	0.478875
Q9P015_MRPL15	4.19	-0.51	1	PF00828	1	0.478875
Q9BYJ9_YTHDF1	4.18	-0.51	1	PF04146	1	0.478833
Q9NVA2_SEPTIN11	4.18	-0.51	1	PF01926	1	0.478833
Q96LI5_CNOT6L	4.17	-0.51	1	PF03372	1	0.478833
Q9BX46_RBM24	4.16	-0.51	1	PF00076	1	0.645458
Q1ED39_KNOP1	4.16	-0.51	1	-	0	0.478792
Q8IYX4_DND1	4.15	-0.51	1	PF14709,PF00076	2	0.47875
Q9NQG5_RPRD1B	4.13	-0.51	1	-	0	0.478708
Q9Y235_APOBEC2	4.11	-0.51	1	PF08210,PF05240	2	0.478667
Q96I25_RBM17	4.09	-0.51	1	PF01585,PF00076	2	0.478625
Q8WXD2_SCG3	4.08	-0.51	1	-	0	0.478583
Q99572_P2RX7	4.07	-0.52	1	-	0	0.478542
Q9GZL7_WDR12	4.07	-0.52	1	PF00400	4	0.478542
P63220_RPS21	4.05	-0.52	1	PF01249	1	0.4785
Q86U44_METTL3	4.03	-0.52	1	-	0	0.478458
Q9BZB8_CPEB1	4.01	-0.52	1	-	0	0.478417
P09543_CNP	4	-0.52	1	PF05881,PF13671	2	0.478375
P56270_MAZ	3.99	-0.52	1	PF00096	1	0.478333
Q15417_CNN3	3.98	-0.52	1	-	0	0.478333
O75530_EED	3.97	-0.52	1	PF00400	1	0.478292
Q9Y6G9_DYNC1LI1	3.97	-0.52	1	-	0	0.478292
O75390_CS	3.96	-0.52	1	-	0	0.47825
P00973_OAS1	3.96	-0.52	1	-	0	0.47825
Q9UK59_DBR1	3.95	-0.52	1	PF05011	1	0.47825
O43818_RRP9	3.94	-0.52	1	PF00400	2	0.478208
Q9UQ35_SRRM2	3.94	-0.52	1	PF08312	1	0.478208
Q15633_TARBP2	3.92	-0.52	1	-	0	0.478167
P04406_GAPDH	3.9	-0.52	1	-	0	0.478125
P41238_APOBEC1	3.9	-0.52	1	PF08210,PF05240	2	0.478125
Q8N9M1_C19orf47	3.9	-0.52	1	-	0	0.478125
Q5T160_RARS2	3.89	-0.53	1	PF00750,PF05746	2	0.478083
Q8N6W0_CELF5	3.88	-0.53	1	-	0	0.478083
P0DPA3_SNHG28	3.87	-0.53	1	-	0	0.478042
P60468_SEC61B	3.87	-0.53	1	-	0	0.478042
P10809_HSPD1	3.86	-0.53	1	-	0	0.478
Q8IZ69_TRMT2A	3.86	-0.53	1	PF05958,PF13847,PF05175	3	0.478
Q9UN36_NDRG2	3.82	-0.53	1	-	0	0.477917
Q8N5X7_EIF4E3	3.81	-0.53	1	PF01652	1	0.477875
Q9BZZ5_API5	3.81	-0.53	1	-	0	0.477875
Q9NQ55_PPAN	3.8	-0.53	1	PF04427	1	0.477875
Q15942_ZYX	3.79	-0.53	1	-	0	0.477833
O43776_NARS1	3.78	-0.53	1	PF00152,PF01336	2	0.477792
Q9NQ94_A1CF	3.78	-0.53	1	PF00076,PF14709	4	0.477792
Q9BWE0_REPIN1	3.77	-0.53	1	PF00096	6	0.477792
Q86UE4_MTDH	3.74	-0.54	1	-	0	0.477708
Q15046_KARS1	3.72	-0.54	1	PF00152,PF01336	2	0.477667
Q96QD9_FYTTD1	3.72	-0.54	1	PF07078	1	0.477667
P84022_SMAD3	3.67	-0.54	1	-	0	0.4775
Q96HR8_NAF1	3.6	-0.54	1	PF04410	1	0.477333
O95391_SLU7	3.59	-0.55	1	PF11708	1	0.477292
Q8WU90_ZC3H15	3.59	-0.55	1	PF00642	1	0.477292
O95864_FADS2	3.57	-0.55	1	-	0	0.47725
Q9H3H1_TRIT1	3.57	-0.55	1	PF01715,PF12171	2	0.47725
P08240_SRPRA	3.55	-0.55	1	PF00448,PF02881	2	0.477208
P27824_CANX	3.53	-0.55	1	PF00262	1	0.477167
P60842_EIF4A1	3.53	-0.55	1	PF00270,PF00271,PF04851	3	0.477167
Q86SG3_DAZ4	3.52	-0.55	1	PF00076	2	0.477125
Q5JVS0_HABP4	3.51	-0.55	1	PF04774	1	0.477083
Q8NDF8_TENT4B	3.47	-0.55	1	PF03828	1	0.477
P31937_HIBADH	3.45	-0.55	1	-	0	0.476958
O60508_CDC40	3.43	-0.55	1	PF00400	2	0.476917
Q9H0L4_CSTF2T	3.37	-0.56	1	PF14327,PF00076,PF14304	3	0.47675
Q9Y606_PUS1	3.36	-0.56	1	PF01416	1	0.476708
Q969S3_ZNF622	3.35	-0.56	1	PF12756,PF12171,PF12874	4	0.643375
O75821_EIF3G	3.34	-0.56	1	PF12353,PF00076	2	0.476667
P55010_EIF5	3.34	-0.56	1	PF01873,PF02020	2	0.476667
Q14296_FASTK	3.33	-0.56	1	PF08368,PF06743,PF08373	3	0.476625
Q14240_EIF4A2	3.32	-0.56	1	PF00270,PF00271,PF04851	3	0.476625
Q96J87_CELF6	3.3	-0.56	1	-	0	0.476542
Q9H095_IQCG	3.3	-0.56	1	-	0	0.476542
Q15796_SMAD2	3.29	-0.56	1	-	0	0.476542
Q13087_PDIA2	3.27	-0.56	1	-	0	0.4765
Q96BK5_PINX1	3.26	-0.56	1	PF01585,PF12656	2	0.476458
Q9UN86_G3BP2	3.25	-0.57	1	PF02136,PF00076	2	0.476417
P08621_SNRNP70	3.24	-0.57	1	PF12220,PF00076	2	0.476417
Q9H1J1_UPF3A	3.24	-0.57	1	PF03467	1	0.476417
Q8NEY8_PPHLN1	3.18	-0.57	1	-	0	0.47625
O76003_GLRX3	3.17	-0.57	1	-	0	0.476208
Q14739_LBR	3.17	-0.57	1	PF01222,PF09465,PF06966	3	0.476208
Q96IZ5_RBM41	3.13	-0.57	1	-	0	0.476125
Q92552_MRPS27	3.11	-0.57	1	PF10037	1	0.476083
Q9NSI8_SAMSN1	3.11	-0.57	1	-	0	0.476083
Q9Y295_DRG1	3.1	-0.57	1	PF01926	1	0.476042
P15311_EZR	3.09	-0.58	1	-	0	0.476
Q16600_ZNF239	3.09	-0.58	1	PF00096	9	0.476
Q9NYH9_UTP6	3.09	-0.58	1	PF08640	1	0.476
Q07955_SRSF1	3.08	-0.58	1	PF00076	2	0.642667
P26641_EEF1G	3.08	-0.58	1	PF00647	1	0.476
Q9NXE8_CWC25	3.08	-0.58	1	PF12542	1	0.476
P35241_RDX	3.07	-0.58	1	-	0	0.475958
Q8N8D1_PDCD7	3.06	-0.58	1	-	0	0.475958
Q9Y2R4_DDX52	3.06	-0.58	1	PF00270,PF00271,PF04851	3	0.475958
O00148_DDX39A	3.04	-0.58	1	PF00270,PF00271,PF04851	3	0.475875
P55084_HADHB	3.01	-0.58	1	-	0	0.475792
Q15427_SF3B4	3.01	-0.58	1	PF00076	2	0.475792
Q9Y5J1_UTP18	3.01	-0.58	1	-	0	0.475792
Q53H54_TRMT12	3	-0.58	1	PF02475	1	0.475792
O75879_GATB	2.99	-0.58	1	PF02637	1	0.47575
P38919_EIF4A3	2.98	-0.58	1	PF00270,PF00271	2	0.47575
Q9BY44_EIF2A	2.97	-0.58	1	PF08662	1	0.475708
Q9Y265_RUVBL1	2.97	-0.58	1	-	0	0.475708
P23381_WARS1	2.93	-0.59	1	PF00579	1	0.475583
O95758_PTBP3	2.9	-0.59	1	PF13893,PF00076	4	0.475542
Q5VTL8_PRPF38B	2.9	-0.59	1	PF03371	1	0.475542
O75319_DUSP11	2.88	-0.59	1	-	0	0.475458
Q00577_PURA	2.88	-0.59	1	PF04845	1	0.475458
Q9UHB9_SRP68	2.88	-0.59	1	-	0	0.475458
O15213_WDR46	2.87	-0.59	1	-	0	0.475458
Q9UNW9_NOVA2	2.87	-0.59	1	PF00013	3	0.475458
P04843_RPN1	2.82	-0.59	1	-	0	0.475333
P0DMV8_HSPA1A	2.82	-0.59	1	-	0	0.475333
P0DMV9_HSPA1B	2.82	-0.59	1	-	0	0.475333
Q8TAS1_UHMK1	2.81	-0.59	1	PF00076	1	0.475292
Q53EL6_PDCD4	2.74	-0.6	1	PF02847	2	0.475125
Q92804_TAF15	2.74	-0.6	1	PF00076,PF00641	2	0.475125
Q8WUB8_PHF10	2.72	-0.6	1	-	0	0.475042
P36578_RPL4	2.69	-0.6	1	PF00573	1	0.475
Q9H9J2_MRPL44	2.69	-0.6	1	-	0	0.475
P39023_RPL3	2.68	-0.6	1	PF00297	1	0.474958
Q86W50_METTL16	2.68	-0.6	1	PF05175	1	0.474958
Q8NC51_SERBP1	2.64	-0.6	1	PF04774	1	0.474833
Q8IZP6_RNF113B	2.63	-0.6	1	PF00642,PF13923,PF00097	3	0.474833
Q8IY67_RAVER1	2.62	-0.6	1	PF00076	3	0.474792
P26368_U2AF2	2.61	-0.6	1	PF00076	3	0.641458
P40925_MDH1	2.59	-0.61	1	-	0	0.474708
Q6PF06_TRMT10B	2.58	-0.61	1	PF01746	1	0.474708
Q9UET6_FTSJ1	2.58	-0.61	1	PF01728	1	0.474708
O75616_ERAL1	2.57	-0.61	1	PF01926	1	0.474667
P05783_KRT18	2.56	-0.61	1	-	0	0.474625
Q53GS9_USP39	2.55	-0.61	1	-	0	0.474625
P05455_SSB	2.53	-0.61	1	PF08777,PF05383,PF00076	3	0.474583
Q9NWK9_ZNHIT6	2.52	-0.61	1	-	0	0.474542
O15371_EIF3D	2.51	-0.61	1	PF05091	1	0.641167
Q8TDN6_BRIX1	2.51	-0.61	1	PF04427	1	0.4745
Q01130_SRSF2	2.5	-0.61	1	PF00076	1	0.4745
[truncated: 65 more rows]
