# Supplementary material for: LINC00106/RPS19BP1/p53 axis promotes the proliferation and migration of human prostate cancer cells
Source: PeerJ journal article supplement (doi:10.7717/peerj.15232), 2023-05-08
Supplement: western_blot.zip [file western_blot.zip]

## Sheet: Sheet1
Block Type	96-Well 0.2-mL Block
Calibration Background is expired	Yes
Calibration Background performed on	04-12-2018
Calibration Pure Dye ABY is expired	Yes
Calibration Pure Dye ABY performed on	04-12-2018
Calibration Pure Dye CY5 is expired	Yes
Calibration Pure Dye CY5 performed on	04-12-2018
Calibration Pure Dye FAM is expired	Yes
Calibration Pure Dye FAM performed on	04-12-2018
Calibration Pure Dye JUN is expired	Yes
Calibration Pure Dye JUN performed on	04-12-2018
Calibration Pure Dye MUSTANG PURPLE is expired	Yes
Calibration Pure Dye MUSTANG PURPLE performed on	04-12-2018
Calibration Pure Dye NED is expired	Yes
Calibration Pure Dye NED performed on	04-12-2018
Calibration Pure Dye ROX is expired	Yes
Calibration Pure Dye ROX performed on	04-12-2018
Calibration Pure Dye SYBR is expired	Yes
Calibration Pure Dye SYBR performed on	04-12-2018
Calibration Pure Dye TAMRA is expired	Yes
Calibration Pure Dye TAMRA performed on	04-12-2018
Calibration Pure Dye VIC is expired	Yes
Calibration Pure Dye VIC performed on	04-12-2018
Calibration ROI is expired	Yes
Calibration ROI performed on	04-12-2018
Calibration Uniformity is expired	Yes
Calibration Uniformity performed on	04-12-2018
Chemistry	SYBR_GREEN
Date Created	2022-03-02 07:46:39 AM PDT
Experiment Barcode
Experiment Comment
Experiment Type	Standard Curve
Instrument Name	272520824
Instrument Serial Number	272520824
Instrument Type	QuantStudio™ 5 System
Passive Reference	ROX
Post-read Stage/Step
Pre-read Stage/Step
Quantification Cycle Method	Ct
Signal Smoothing On	true
Stage where Melt Analysis is performed	Stage3
Stage/ Cycle where Ct Analysis is performed	Stage2, Step2
User Name
Well	Well Position	Omit	Sample Name	Target Name	Task	Reporter	Quencher	CT	Quantity	Quantity Mean	Quantity SD	Y-Intercept	R(superscript 2)	Slope	Efficiency	Automatic Ct Threshold	Ct Threshold	Automatic Baseline	Baseline Start	Baseline End	Amp Status	Comments	Cq Conf	THOLDFAIL	CQCONF	EXPFAIL	HIGHSD	OUTLIERRG	MTP	Tm1	Tm2	Tm3	Tm4
1	A1	FALSE	INPUT	DU	UNKNOWN	SYBR	None	25.9012								TRUE	0.191519	TRUE	3	3	Amp		0.9486	N	N	N	N	N	N	83.2225
2	A2	FALSE	INPUT	DU	UNKNOWN	SYBR	None	25.8217								TRUE	0.191519	TRUE	3	3	Amp		0.941166	N	N	N	N	N	N	82.9304
3	A3	FALSE	INPUT	DU	UNKNOWN	SYBR	None	26.0698								TRUE	0.191519	TRUE	3	3	Amp		0.953208	N	N	N	N	N	N	82.8075
4	A4	FALSE	INPUT	DU	UNKNOWN	SYBR	None	26.2648								TRUE	0.191519	TRUE	3	3	Amp		0.954531	N	N	N	N	N	N	82.9537
5	A5	FALSE	RPS19BP1	DU	UNKNOWN	SYBR	None	27.9034								TRUE	0.04	TRUE	3	30	Amp		0.814773	Y	N	N	Y	N	Y	79.4083	75.3225	84.9532
6	A6	FALSE	RPS19BP1	DU	UNKNOWN	SYBR	None	28.1522								TRUE	0.04	TRUE	3	32	Inconclusive		0.821791	Y	N	N	Y	N	N	75.7603
7	A7	FALSE	RPS19BP1	DU	UNKNOWN	SYBR	None	28.4877								TRUE	0.04	TRUE	3	32	Amp		0.883287	Y	N	N	Y	N	Y	74.0213	79.425	84.9749
8	A8	FALSE	RPS19BP1	DU	UNKNOWN	SYBR	None	27.9972								TRUE	0.04	TRUE	3	30	Amp		0.894025	Y	N	N	Y	N	Y	79.5711	74.8976	85.1209
9	A9	FALSE	IGG	DU	UNKNOWN	SYBR	None	32.3316								TRUE	0.293115	TRUE	3	9	Amp		0.979748	N	N	N	N	N	N	83.6561
10	A10	FALSE	IGG	DU	UNKNOWN	SYBR	None	32.0452								TRUE	0.293115	TRUE	3	10	Amp		0.967916	N	N	N	N	N	N	83.8022
11	A11	FALSE	IGG	DU	UNKNOWN	SYBR	None	32.1134								TRUE	0.293115	TRUE	3	9	Amp		0.967923	N	N	N	N	N	N	83.9759
12	A12	FALSE	IGG	DU	UNKNOWN	SYBR	None	31.9881								TRUE	0.293115	TRUE	3	10	Amp		0.974883	N	N	N	N	N	N	84.1221
13	B1	FALSE	INPUT	pc	UNKNOWN	SYBR	None	22.2152								TRUE	0.38518	TRUE	3	17	Amp		0.938863	N	N	N	N	N	N	83.6031	N
14	B2	FALSE	INPUT	pc	UNKNOWN	SYBR	None	22.1379								TRUE	0.38518	TRUE	3	17	Amp		0.938117	N	N	N	Y	N	Y	83.5404	N
15	B3	FALSE	INPUT	pc	UNKNOWN	SYBR	None	22.0751								TRUE	0.38518	TRUE	3	17	Amp		0.947961	N	N	N	Y	N	N	83.5404	N
16	B4	FALSE	INPUT	pc	UNKNOWN	SYBR	None	22.4179								TRUE	0.38518	TRUE	3	17	Amp		0.949723	N	N	N	Y	N	Y	83.5673	N
17	B5	FALSE	RPS19BP1	pc	UNKNOWN	SYBR	None	24.9859								TRUE	0.379691	TRUE	3	17	Amp		0.951194	N	N	N	Y	N	Y	83.7507	N
18	B6	FALSE	RPS19BP1	pc	UNKNOWN	SYBR	None	24.8492								TRUE	0.379691	TRUE	3	17	Amp		0.946838	N	N	N	N	N	N	83.7507	N
19	B7	FALSE	RPS19BP1	pc	UNKNOWN	SYBR	None	24.8737								TRUE	0.379691	TRUE	3	21	Amp		0.925228	N	N	N	N	N	N	88.7281	N
20	B8	FALSE	RPS19BP1	pc	UNKNOWN	SYBR	None	25.2593								TRUE	0.379691	TRUE	3	21	Amp		0.92571	N	N	N	N	N	N	88.7281	N
21	B9	FALSE	IGG	pc	UNKNOWN	SYBR	None	29.942								TRUE	0.420075	TRUE	3	20	Amp		0.934302	N	N	N	N	N	N	88.766	N
22	B10	FALSE	IGG	pc	UNKNOWN	SYBR	None	30.267								TRUE	0.420075	TRUE	3	21	Amp		0.905685	N	N	N	N	N	N	88.9135	N
23	B11	FALSE	IGG	pc	UNKNOWN	SYBR	None	30.2369								TRUE	0.420075	TRUE	3	20	Amp		0.907757	N	N	N	N	N	N	88.8367	N
24	B12	FALSE	IGG	pc	UNKNOWN	SYBR	None	30.3803								TRUE	0.420075	TRUE	3	21	Amp		0.885844	Y	N	N	N	N	N	88.9838	N	73.5362

## Sheet: Sheet2
du
	INPUT	25.9012	-6.21881	74.4814
	INPUT	25.8217	-6.29833	78.702
	INPUT	26.0698	-6.05017	66.2646
	INPUT	26.2648	-5.85521	57.8888
	RPS19BP1	27.9034	-4.21664	18.5924
	RPS19BP1	28.1522	-3.96776	15.6464
	RPS19BP1	28.4877	-3.63233	12.4006
	RPS19BP1	27.9972	-4.12281	17.4217
	IGG	32.3316	0.211558	0.863604
	IGG	32.0452	-0.0747691	1.05319
	IGG	32.1134	-0.00664913	1.00462
	IGG	31.9881	-0.131905	1.09574
pc	INPUT	22.2152	-7.99182	254.553
	INPUT	22.1379	-8.0691	268.559
	INPUT	22.0751	-8.13195	280.518
	INPUT	22.4179	-7.78912	221.187
	RPS19BP1	24.9859	-5.22115	37.3012
	RPS19BP1	24.8492	-5.35784	41.0083
	RPS19BP1	24.8737	-5.33332	40.317
	RPS19BP1	25.2593	-4.94773	30.8615
	IGG	29.942	-0.264987	1.20163
	IGG	30.267	0.0600185	0.959252
	IGG	30.2369	0.029861	0.979515
	IGG	30.3803	0.173312	0.886805
